# Supplementary material for: Unique spin crossover pathways differentiated by scan rate in a new dinuclear Fe( ii ) triple helicate: mechanistic deductions enabled by synchrotron radiation studies
Source: Royal Society of Chemistry journal article supplement (doi:10.1039/d2tc04998h), 2023-01-01
Supplement: d2tc04998h1.pdf [file d2tc04998h1.pdf]

# Unique Spin Crossover Pathways Differentiated by Scan Rate in a New Dinuclear Fe(II) Triple Helicate: Mechanistic Deductions Enabled by Synchrotron Radiation Studies

*Matthew J. Wallis, Alexander R. Craze, Hikaru Zenno, Ryuya Tokunaga, Takahiro Taira,  
Hyunsung Min, Mohan M. Bhadbhade, Saroj Kumar Bhattacharyya, Ruoming Tian, Anne M.  
Rich, Shinya Hayami, Jack K. Clegg, Christopher E. Marjo, Leonard F. Lindoy and Feng Li\**

## **Corresponding Author**

**Feng Li** | PhD, FRSC, MRACI CChem - *School of Science, Western Sydney University,  
Locked Bag 1797, Penrith NSW 2751, Australia; Email: [feng.li@westernsydney.edu.au](mailto:feng.li@westernsydney.edu.au)*

## Supplementary Information

|       |                                                                   |    |
|-------|-------------------------------------------------------------------|----|
| S1.   | Crystallographic Refinement Details .....                         | 3  |
| S2.   | Crystallographic data tables .....                                | 4  |
| S3.   | Physical Measurements.....                                        | 1  |
| S3.1. | Characterisation of ligand L .....                                | 1  |
| S3.2. | Characterisation of 1·6H <sub>2</sub> O .....                     | 3  |
| S4.   | Mössbauer, SQUID and LIESST analysis of 1 .....                   | 5  |
| S4.1. | Mössbauer analysis of 1·6H <sub>2</sub> O and desolvated 1 .....  | 5  |
| S4.2. | LIESST measurements of 1·6H <sub>2</sub> O and desolvated 1 ..... | 5  |
| S5.   | Variable temperature Raman spectroscopy.....                      | 7  |
| S6.   | Intermolecular interactions of 1-MeCN .....                       | 8  |
| S7.   | Scaling of crystal packing coefficient and molecular volume. .... | 15 |
| S8.   | Helicate structural parameters.....                               | 16 |
| S8.1. | Linker torsion.....                                               | 17 |
| S8.2. | Pitch and yaw .....                                               | 18 |
| S8.3. | Chelate ring angles and bond axis .....                           | 19 |
| S9.   | PXRD .....                                                        | 21 |
| S9.1. | PXRD Patterns .....                                               | 21 |
| S9.2. | PXRD scan-rate dependent spectral differences.....                | 26 |
| S9.3. | PXRD lattice parameters.....                                      | 28 |
| S10.  | References .....                                                  | 30 |

## S1. Crystallographic Refinement Details

All but two crystal structures bore the triclinic space group  $P-1$ , with approximate cell length parameters  $a$ ,  $b$  and  $c$  of 16.2, 17.8 and 20.5 Å, respectively, and approximate angular parameters  $\alpha$ ,  $\beta$ ,  $\gamma$  of 80°, 90° and 75° respectively. In these structures, the resolved asymmetric unit contained a  $[\text{FeL}_3]^{4+}$  helicate, 4  $\text{BF}_4^-$  counterions, 4 acetonitriles, 1 diethyl ether and 0-6 water molecules, depending on the degree of disorder in the solvents. The exceptions of 1-MeCN@100/4 and 1-MeCN@150/4 crystal structures exhibited symmetry breaking, via the doubling of the  $c$ -axis and loss of half of the inversion centres together with a doubling of the molecules in the asymmetric unit. A solvent mask was applied in all crystal structures except 1-MeCN@100/relax to account for the electron density of all poorly resolved water molecules. In well-ordered structures, the entire helicate molecule was refined anisotropically. Several structures exhibited disorder in chelate rings, linkers and terminal moieties. In disordered structures the restraints DFIX, DANG, SADI, FLAT and RIGU were used to appropriately model various groups. Terminal and linker groups were split in structures where they could be resolved at distinct positions and refined against free variables. Where satisfactory anisotropic modelling was not possible, sections of the helicate were modelled isotropically.  $\text{BF}_4^-$  counterions and solvents were modelled anisotropically where possible; the restraints DFIX, DANG, SADI and RIGU were implemented where appropriate and in some cases idealised rigid bodies were used for modelling.<sup>1</sup> Where multiple positions could be resolved, molecules were split and refined against free variables. Hydrogen atoms were fixed using a riding model, though some were removed to allow convergence of shifts to zero.

## S2. Crystallographic data tables

Table S1. Crystallographic data for 1-MeCN at 250 K, after full relaxation at 100 K, after flash cooling to 100 K and at a scan rate of 4 K min<sup>-1</sup>.

| Temperature (K) / Scan rate (K min <sup>-1</sup> ) | 250 (mounted at 250 K)                                                                                         | 100/Relax                                                                                                         | 100/Flash                                                                                                         | 100/4                                                                                                             | 150/4                                                                                                                           | 200/4                                                                                                             |
|----------------------------------------------------|----------------------------------------------------------------------------------------------------------------|-------------------------------------------------------------------------------------------------------------------|-------------------------------------------------------------------------------------------------------------------|-------------------------------------------------------------------------------------------------------------------|---------------------------------------------------------------------------------------------------------------------------------|-------------------------------------------------------------------------------------------------------------------|
| CCDC Number                                        | 2215606                                                                                                        | 2215607                                                                                                           | 2215608                                                                                                           | 2215605                                                                                                           | 2215604                                                                                                                         | 2215603                                                                                                           |
| Empirical formula                                  | C <sub>102</sub> H <sub>88</sub> B <sub>4</sub> F <sub>16</sub> Fe <sub>2</sub> N <sub>28</sub> O <sub>4</sub> | C <sub>102</sub> H <sub>88</sub> B <sub>4</sub> F <sub>16</sub> Fe <sub>2</sub> N <sub>28</sub> O <sub>9.75</sub> | C <sub>102</sub> H <sub>72</sub> B <sub>4</sub> F <sub>16</sub> Fe <sub>2</sub> N <sub>28</sub> O <sub>4.25</sub> | C <sub>102</sub> H <sub>66</sub> B <sub>4</sub> F <sub>16</sub> Fe <sub>2</sub> N <sub>28</sub> O <sub>4.38</sub> | C <sub>100</sub> H <sub>71.5</sub> B <sub>4</sub> F <sub>16</sub> Fe <sub>2</sub> N <sub>2</sub> <sub>8</sub> O <sub>3.62</sub> | C <sub>102</sub> H <sub>85</sub> B <sub>4</sub> F <sub>16</sub> Fe <sub>2</sub> N <sub>28</sub> O <sub>4.25</sub> |
| Formula weight                                     | 2228.94                                                                                                        | 2320.94                                                                                                           | 2216.81                                                                                                           | 2212.76                                                                                                           | 2182.29                                                                                                                         | 2229.91                                                                                                           |
| Temperature (K)                                    | 250.00                                                                                                         | 100.00                                                                                                            | 100                                                                                                               | 100.00                                                                                                            | 150.00                                                                                                                          | 200.00                                                                                                            |
| Crystal system                                     | triclinic                                                                                                      | triclinic                                                                                                         | triclinic                                                                                                         | triclinic                                                                                                         | triclinic                                                                                                                       | triclinic                                                                                                         |
| Space group                                        | P-1                                                                                                            | P-1                                                                                                               | P-1                                                                                                               | P-1                                                                                                               | P-1                                                                                                                             | P-1                                                                                                               |
| <i>a</i> (Å)                                       | 16.220(3)                                                                                                      | 16.2552(12)                                                                                                       | 16.170(3)                                                                                                         | 16.200(3)                                                                                                         | 16.213(3)                                                                                                                       | 16.170(3)                                                                                                         |
| <i>b</i> (Å)                                       | 18.180(4)                                                                                                      | 16.7337(13)                                                                                                       | 17.720(4)                                                                                                         | 17.690(4)                                                                                                         | 17.771(4)                                                                                                                       | 17.980(4)                                                                                                         |
| <i>c</i> (Å)                                       | 20.750(4)                                                                                                      | 20.6466(16)                                                                                                       | 20.400(4)                                                                                                         | 40.670(8)                                                                                                         | 40.795(8)                                                                                                                       | 20.660(4)                                                                                                         |
| $\alpha$ (°)                                       | 79.51(3)                                                                                                       | 95.700(2)                                                                                                         | 80.66(3)                                                                                                          | 80.68(3)                                                                                                          | 80.50(3)                                                                                                                        | 79.96(3)                                                                                                          |
| $\beta$ (°)                                        | 88.31(3)                                                                                                       | 90.632(2)                                                                                                         | 89.87(3)                                                                                                          | 89.96(3)                                                                                                          | 89.67(3)                                                                                                                        | 89.02(3)                                                                                                          |
| $\gamma$ (°)                                       | 72.75(3)                                                                                                       | 106.361(2)                                                                                                        | 72.53(3)                                                                                                          | 72.52(3)                                                                                                          | 72.56(3)                                                                                                                        | 72.68(3)                                                                                                          |
| Volume (Å <sup>3</sup> )                           | 5744(2)                                                                                                        | 5357.5(7)                                                                                                         | 5495(2)                                                                                                           | 10956(4)                                                                                                          | 11048(4)                                                                                                                        | 5643(2)                                                                                                           |
| <i>Z</i>                                           | 2                                                                                                              | 2                                                                                                                 | 2                                                                                                                 | 4                                                                                                                 | 4                                                                                                                               | 2                                                                                                                 |
| $\rho_{\text{calc}}$ (g cm <sup>-3</sup> )         | 1.289                                                                                                          | 1.439                                                                                                             | 1.340                                                                                                             | 1.342                                                                                                             | 1.312                                                                                                                           | 1.312                                                                                                             |
| $\mu$ (mm <sup>-1</sup> )                          | 0.339                                                                                                          | 0.370                                                                                                             | 0.354                                                                                                             | 0.355                                                                                                             | 0.351                                                                                                                           | 0.345                                                                                                             |
| F(000)                                             | 2288.0                                                                                                         | 2380.0                                                                                                            | 2260.0                                                                                                            | 4500.0                                                                                                            | 4450.0                                                                                                                          | 2286.0                                                                                                            |
| Crystal size (mm <sup>3</sup> )                    | 0.2 × 0.1 × 0.02                                                                                               | 0.2 × 0.1 × 0.02                                                                                                  | 0.2 × 0.1 × 0.02                                                                                                  | 0.2 × 0.1 × 0.02                                                                                                  | 0.2 × 0.1 × 0.02                                                                                                                | 0.2 × 0.1 × 0.01                                                                                                  |
| Radiation                                          | MoK $\alpha$ ( $\lambda$ = 0.71073)                                                                            | MoK $\alpha$ ( $\lambda$ = 0.71073)                                                                               | MoK $\alpha$ ( $\lambda$ = 0.71073)                                                                               | MoK $\alpha$ ( $\lambda$ = 0.71073)                                                                               | MoK $\alpha$ ( $\lambda$ = 0.71073)                                                                                             | MoK $\alpha$ ( $\lambda$ = 0.71073)                                                                               |
| 2 $\theta$ range for data collection (°)           | 1.996 to 57.286                                                                                                | 3.968 to 41.748                                                                                                   | 2.026 to 57.222                                                                                                   | 1.016 to 57.476                                                                                                   | 1.014 to 57.364                                                                                                                 | 2.004 to 57.084                                                                                                   |
| Index ranges                                       | -20 ≤ <i>h</i> ≤ 21, -23 ≤ <i>k</i> ≤ 24, -25 ≤ <i>l</i> ≤ 25                                                  | -16 ≤ <i>h</i> ≤ 16, -16 ≤ <i>k</i> ≤ 16, -20 ≤ <i>l</i> ≤ 20                                                     | -21 ≤ <i>h</i> ≤ 21, -23 ≤ <i>k</i> ≤ 23, -26 ≤ <i>l</i> ≤ 27                                                     | -21 ≤ <i>h</i> ≤ 21, -23 ≤ <i>k</i> ≤ 23, -52 ≤ <i>l</i> ≤ 52                                                     | ? ≤ <i>h</i> ≤ ?, ? ≤ <i>k</i> ≤ ?, ? ≤ <i>l</i> ≤ ?                                                                            | -21 ≤ <i>h</i> ≤ 21, -24 ≤ <i>k</i> ≤ 23, -26 ≤ <i>l</i> ≤ 26                                                     |

| Temperature (K) / Scan rate (K min <sup>-1</sup> ) | 250 (mounted at 250 K)                                         | 100/Relax                                                      | 100/Flash                                                      | 100/4                                                          | 150/4                                                          | 200/4                                                          |
|----------------------------------------------------|----------------------------------------------------------------|----------------------------------------------------------------|----------------------------------------------------------------|----------------------------------------------------------------|----------------------------------------------------------------|----------------------------------------------------------------|
| Reflections collected                              | 142373                                                         | 131246                                                         | 135886                                                         | 265003                                                         | 44873                                                          | 138000                                                         |
| Independent reflections                            | 23835 [R <sub>int</sub> = 0.0345, R <sub>sigma</sub> = 0.0225] | 11276 [R <sub>int</sub> = 0.0656, R <sub>sigma</sub> = 0.0274] | 22448 [R <sub>int</sub> = 0.0235, R <sub>sigma</sub> = 0.0150] | 44565 [R <sub>int</sub> = 0.0418, R <sub>sigma</sub> = 0.0291] | 44873 [R <sub>int</sub> = 0.0455, R <sub>sigma</sub> = 0.0223] | 23020 [R <sub>int</sub> = 0.0209, R <sub>sigma</sub> = 0.0142] |
| Data/restraints/parameters                         | 23835/588/1404                                                 | 11276/6/1440                                                   | 22448/1580/1907                                                | 44565/1746/3144                                                | 44873/1950/3116                                                | 23020/1216/1789                                                |
| Goodness-of-fit on F <sup>2</sup>                  | 1.083                                                          | 1.070                                                          | 1.878                                                          | 1.811                                                          | 1.769                                                          | 1.035                                                          |
| Final R indexes [I ≥ 2σ(I)]                        | R <sub>1</sub> = 0.0791, wR <sub>2</sub> = 0.2486              | R <sub>1</sub> = 0.0756, wR <sub>2</sub> = 0.1856              | R <sub>1</sub> = 0.1183, wR <sub>2</sub> = 0.4020              | R <sub>1</sub> = 0.1484, wR <sub>2</sub> = 0.4366              | R <sub>1</sub> = 0.1428, wR <sub>2</sub> = 0.4226              | R <sub>1</sub> = 0.0832, wR <sub>2</sub> = 0.2585              |
| Final R indexes [all data]                         | R <sub>1</sub> = 0.0965, wR <sub>2</sub> = 0.2716              | R <sub>1</sub> = 0.0871, wR <sub>2</sub> = 0.1953              | R <sub>1</sub> = 0.1332, wR <sub>2</sub> = 0.4240              | R <sub>1</sub> = 0.1846, wR <sub>2</sub> = 0.4696              | R <sub>1</sub> = 0.1743, wR <sub>2</sub> = 0.4518              | R <sub>1</sub> = 0.0947, wR <sub>2</sub> = 0.2730              |
| Largest diff. peak/hole / e Å <sup>-3</sup>        | 0.83/-1.19                                                     | 1.47/-0.83                                                     | 1.22/-1.09                                                     | 2.29/-1.11                                                     | 2.15/-0.88                                                     | 1.32/-0.66                                                     |

Table S2. Crystallographic data for **1** at scan rates 1 K min<sup>-1</sup> and 2 K min<sup>-1</sup>.

| Temperature (K) / Scan rate (K min <sup>-1</sup> ) | 100/1                                                                                                               | 150/1                                                                                                             | 200/1                                                                                                             | 100/2                                                                                                          | 150/2                                                                                                          | 200/2                                                                                                             |
|----------------------------------------------------|---------------------------------------------------------------------------------------------------------------------|-------------------------------------------------------------------------------------------------------------------|-------------------------------------------------------------------------------------------------------------------|----------------------------------------------------------------------------------------------------------------|----------------------------------------------------------------------------------------------------------------|-------------------------------------------------------------------------------------------------------------------|
| CCDC Number                                        | 2215599                                                                                                             | 2215598                                                                                                           | 2215597                                                                                                           | 2215602                                                                                                        | 2215601                                                                                                        | 2215600                                                                                                           |
| Empirical formula                                  | C <sub>101</sub> H <sub>79</sub> B <sub>4</sub> F <sub>16</sub> Fe <sub>2</sub> N <sub>27.5</sub> O <sub>4.25</sub> | C <sub>102</sub> H <sub>82</sub> B <sub>4</sub> F <sub>16</sub> Fe <sub>2</sub> N <sub>28</sub> O <sub>4.25</sub> | C <sub>102</sub> H <sub>82</sub> B <sub>4</sub> F <sub>16</sub> Fe <sub>2</sub> N <sub>28</sub> O <sub>4.25</sub> | C <sub>102</sub> H <sub>79</sub> B <sub>4</sub> F <sub>16</sub> Fe <sub>2</sub> N <sub>28</sub> O <sub>4</sub> | C <sub>102</sub> H <sub>82</sub> B <sub>4</sub> F <sub>16</sub> Fe <sub>2</sub> N <sub>28</sub> O <sub>4</sub> | C <sub>102</sub> H <sub>82</sub> B <sub>4</sub> F <sub>16</sub> Fe <sub>2</sub> N <sub>28</sub> O <sub>4.25</sub> |
| Formula weight                                     | 2204.85                                                                                                             | 2226.89                                                                                                           | 2226.89                                                                                                           | 2219.87                                                                                                        | 2222.89                                                                                                        | 2226.89                                                                                                           |
| Temperature (K)                                    | 100.00                                                                                                              | 150.00                                                                                                            | 200.00                                                                                                            | 100.00                                                                                                         | 150.00                                                                                                         | 200.00                                                                                                            |
| Crystal system                                     | triclinic                                                                                                           | triclinic                                                                                                         | triclinic                                                                                                         | triclinic                                                                                                      | triclinic                                                                                                      | triclinic                                                                                                         |
| Space group                                        | P-1                                                                                                                 | P-1                                                                                                               | P-1                                                                                                               | P-1                                                                                                            | P-1                                                                                                            | P-1                                                                                                               |
| <i>a</i> (Å)                                       | 16.220(3)                                                                                                           | 16.230(3)                                                                                                         | 16.190(3)                                                                                                         | 16.190(3)                                                                                                      | 16.220(3)                                                                                                      | 16.230(3)                                                                                                         |
| <i>b</i> (Å)                                       | 17.820(4)                                                                                                           | 17.910(4)                                                                                                         | 18.080(4)                                                                                                         | 17.720(4)                                                                                                      | 17.830(4)                                                                                                      | 18.070(4)                                                                                                         |
| <i>c</i> (Å)                                       | 20.390(4)                                                                                                           | 20.470(4)                                                                                                         | 20.660(4)                                                                                                         | 20.520(4)                                                                                                      | 20.570(4)                                                                                                      | 20.630(4)                                                                                                         |
| <i>α</i> (°)                                       | 80.28(3)                                                                                                            | 80.13(3)                                                                                                          | 79.71(3)                                                                                                          | 80.09(3)                                                                                                       | 79.97(3)                                                                                                       | 79.64(3)                                                                                                          |

| Temperature (K) /<br>Scan rate (K min <sup>-1</sup> ) | 100/1                                                                | 150/1                                                                | 200/1                                                                | 100/2                                                                | 150/2                                                                | 200/2                                                                |
|-------------------------------------------------------|----------------------------------------------------------------------|----------------------------------------------------------------------|----------------------------------------------------------------------|----------------------------------------------------------------------|----------------------------------------------------------------------|----------------------------------------------------------------------|
| $\beta$ (°)                                           | 89.54(3)                                                             | 89.33(3)                                                             | 88.79(3)                                                             | 89.48(3)                                                             | 89.25(3)                                                             | 88.86(3)                                                             |
| $\gamma$ (°)                                          | 72.46(3)                                                             | 72.51(3)                                                             | 72.69(3)                                                             | 72.58(3)                                                             | 72.52(3)                                                             | 72.60(3)                                                             |
| Volume (Å <sup>3</sup> )                              | 5533(2)                                                              | 5586(2)                                                              | 5678(2)                                                              | 5527(2)                                                              | 5583(2)                                                              | 5676(2)                                                              |
| Z                                                     | 2                                                                    | 2                                                                    | 2                                                                    | 2                                                                    | 2                                                                    | 2                                                                    |
| $\rho_{\text{calc}}$ (g cm <sup>-3</sup> )            | 1.323                                                                | 1.324                                                                | 1.303                                                                | 1.334                                                                | 1.322                                                                | 1.303                                                                |
| $\mu$ (mm <sup>-1</sup> )                             | 0.351                                                                | 0.349                                                                | 0.343                                                                | 0.352                                                                | 0.349                                                                | 0.343                                                                |
| F(000)                                                | 2255.0                                                               | 2280.0                                                               | 2280.0                                                               | 2270.0                                                               | 2276.0                                                               | 2280.0                                                               |
| Crystal size (mm <sup>3</sup> )                       | 0.2 × 0.1 × 0.02                                                     | 0.2 × 0.1 × 0.02                                                     | 0.2 × 0.1 × 0.02                                                     | 0.2 × 0.1 × 0.02                                                     | 0.2 × 0.1 × 0.02                                                     | 0.2 × 0.1 × 0.02                                                     |
| Radiation                                             | MoK $\alpha$ ( $\lambda$ = 0.71073)                                  | MoK $\alpha$ ( $\lambda$ =<br>0.71073)                               |
| 2 $\Theta$ range for data<br>collection (°)           | 2.028 to 57.352                                                      | 2.022 to 57.396                                                      | 2.004 to 57.384                                                      | 2.016 to 57.372                                                      | 2.012 to 57.302                                                      | 2.008 to 57.384                                                      |
| Index ranges                                          | -20 ≤ h ≤ 20, -23 ≤ k<br>≤ 23, -25 ≤ l ≤ 25                          | -20 ≤ h ≤ 20, -23 ≤<br>k ≤ 23, -26 ≤ l ≤ 25                          | -20 ≤ h ≤ 20, -23 ≤<br>k ≤ 23, -26 ≤ l ≤ 26                          | -21 ≤ h ≤ 21, -23<br>≤ k ≤ 23, -27 ≤ l ≤<br>27                       | -21 ≤ h ≤ 21, -24<br>≤ k ≤ 23, -27 ≤ l ≤<br>27                       | -21 ≤ h ≤ 21, -24 ≤<br>k ≤ 24, -26 ≤ l ≤ 27                          |
| Reflections collected                                 | 137720                                                               | 139097                                                               | 140644                                                               | 135105                                                               | 136769                                                               | 138164                                                               |
| Independent<br>reflections                            | 22920 [R <sub>int</sub> =<br>0.0210, R <sub>sigma</sub> =<br>0.0143] | 23111 [R <sub>int</sub> =<br>0.0238, R <sub>sigma</sub> =<br>0.0162] | 23499 [R <sub>int</sub> =<br>0.0236, R <sub>sigma</sub> =<br>0.0153] | 22889 [R <sub>int</sub> =<br>0.0250, R <sub>sigma</sub> =<br>0.0138] | 23161 [R <sub>int</sub> =<br>0.0201, R <sub>sigma</sub> =<br>0.0126] | 23548 [R <sub>int</sub> =<br>0.0287, R <sub>sigma</sub> =<br>0.0178] |
| Data/restraints/param<br>eters                        | 22920/1589/1525                                                      | 23111/1543/1596                                                      | 23499/743/1584                                                       | 22889/1130/1397                                                      | 23161/1175/1378                                                      | 23548/1179/1675                                                      |
| Goodness-of-fit on F <sup>2</sup>                     | 2.583                                                                | 2.163                                                                | 1.077                                                                | 2.340                                                                | 2.321                                                                | 1.511                                                                |
| Final R indexes<br>[I ≥ 2 $\sigma$ (I)]               | R <sub>1</sub> = 0.1792, wR <sub>2</sub> =<br>0.5405                 | R <sub>1</sub> = 0.1510, wR <sub>2</sub> =<br>0.4755                 | R <sub>1</sub> = 0.0690, wR <sub>2</sub> =<br>0.2166                 | R <sub>1</sub> = 0.1379,<br>wR <sub>2</sub> = 0.4567                 | R <sub>1</sub> = 0.1316,<br>wR <sub>2</sub> = 0.4519                 | R <sub>1</sub> = 0.0858, wR <sub>2</sub> =<br>0.3045                 |
| Final R indexes [all<br>data]                         | R <sub>1</sub> = 0.2039, wR <sub>2</sub> =<br>0.5741                 | R <sub>1</sub> = 0.1755, wR <sub>2</sub> =<br>0.5091                 | R <sub>1</sub> = 0.0803, wR <sub>2</sub> =<br>0.2324                 | R <sub>1</sub> = 0.1447,<br>wR <sub>2</sub> = 0.4733                 | R <sub>1</sub> = 0.1384,<br>wR <sub>2</sub> = 0.4696                 | R <sub>1</sub> = 0.0904, wR <sub>2</sub> =<br>0.3181                 |
| Largest diff.<br>peak/hole / e Å <sup>-3</sup>        | 1.59/-1.05                                                           | 1.66/-1.02                                                           | 0.98/-0.74                                                           | 1.80/-0.87                                                           | 1.76/-0.88                                                           | 1.28/-0.77                                                           |

**Table S3.** Table of coordinate bond length in all SCXRD structures. Note that labels G, H and I were used to label the ligands A, B and C, respectively for the [MS-MS] helicate species found in **1@100/4** and **1@150/4**.

| Coordinate Bond | <b>1@250</b> | <b>1@100/Relax</b> | <b>1@100/Flash</b> | <b>1@100/1</b> | <b>1@150/1</b> | <b>1@200/1</b> | <b>1@100/2</b> | <b>1@150/2</b> | <b>1@200/2</b> | <b>1@100/4</b> | <b>1@150/4</b> | <b>1@200/4</b> |
|-----------------|--------------|--------------------|--------------------|----------------|----------------|----------------|----------------|----------------|----------------|----------------|----------------|----------------|
| CCDC Number     | 2215606      | 2215607            | 2215608            | 2215599        | 2215598        | 2215597        | 2215602        | 2215601        | 2215600        | 2215605        | 2215604        | 2215603        |
| Fe1—N3A (Å)     | 2.168 (3)    | 2.166 (5)          | 2.125 (5)          | 2.135 (8)      | 2.151 (7)      | 2.169 (2)      | 2.121 (4)      | 2.138 (4)      | 2.159 (2)      | 2.170 (7)      | 2.138 (5)      | 2.168 (3)      |
| Fe1—N3B (Å)     | 2.137 (3)    | 2.136 (5)          | 2.105 (5)          | 2.079 (8)      | 2.096 (6)      | 2.129 (2)      | 2.091 (4)      | 2.092 (4)      | 2.126 (2)      | 2.206 (8)      | 2.108 (5)      | 2.124 (3)      |
| Fe1—N3C (Å)     | 2.169 (3)    | 2.166 (5)          | 2.119 (5)          | 2.094 (7)      | 2.121 (6)      | 2.168 (2)      | 2.108 (4)      | 2.118 (4)      | 2.162 (2)      | 2.144 (6)      | 2.149 (5)      | 2.169 (3)      |
| Fe1—N4A (Å)     | 2.249 (3)    | 2.212 (5)          | 2.196 (7)          | 2.123 (10)     | 2.206 (8)      | 2.243 (3)      | 2.158 (5)      | 2.173 (5)      | 2.239 (3)      | 2.137 (6)      | 2.222 (6)      | 2.243 (3)      |
| Fe1—N4B (Å)     | 2.236 (3)    | 2.262 (5)          | 2.209 (5)          | 2.197 (7)      | 2.200 (6)      | 2.230 (2)      | 2.175 (4)      | 2.193 (4)      | 2.228 (2)      | 2.125 (6)      | 2.242 (5)      | 2.231 (3)      |
| Fe1—N4C (Å)     | 2.212 (3)    | 2.211 (5)          | 2.176 (5)          | 2.168 (7)      | 2.184 (6)      | 2.211 (2)      | 2.160 (5)      | 2.178 (4)      | 2.200 (2)      | 2.144 (6)      | 2.205 (5)      | 2.210 (3)      |
| Fe2—N5A (Å)     | 2.246 (3)    | 2.017 (5)          | 2.109 (6)          | 2.126 (9)      | 2.147 (7)      | 2.241 (3)      | 2.109 (5)      | 2.149 (5)      | 2.226 (3)      | 1.980 (6)      | 2.018 (5)      | 2.225 (3)      |
| Fe2—N5B (Å)     | 2.228 (3)    | 2.012 (5)          | 2.090 (4)          | 2.100 (5)      | 2.130 (5)      | 2.220 (2)      | 2.114 (4)      | 2.127 (4)      | 2.204 (2)      | 2.017 (5)      | 2.027 (4)      | 2.207 (3)      |
| Fe2—N5C (Å)     | 2.231 (3)    | 2.009 (5)          | 2.100 (4)          | 2.115 (5)      | 2.151 (4)      | 2.224 (3)      | 2.109 (4)      | 2.126 (4)      | 2.216 (2)      | 2.053 (4)      | 2.066 (4)      | 2.211 (3)      |
| Fe2—N6A (Å)     | 2.138 (3)    | 1.982 (5)          | 2.042 (4)          | 2.065 (6)      | 2.093 (5)      | 2.134 (2)      | 2.040 (4)      | 2.059 (4)      | 2.128 (2)      | 1.983 (5)      | 1.999 (5)      | 2.126 (3)      |
| Fe2—N6B (Å)     | 2.156 (3)    | 1.977 (5)          | 2.052 (3)          | 2.059 (5)      | 2.081 (4)      | 2.149 (2)      | 2.057 (4)      | 2.071 (3)      | 2.139 (2)      | 2.007 (4)      | 2.007 (4)      | 2.135 (3)      |
| Fe2—N6C (Å)     | 2.167 (3)    | 1.979 (5)          | 2.054 (3)          | 2.041 (5)      | 2.068 (5)      | 2.159 (3)      | 2.054 (4)      | 2.073 (3)      | 2.155 (2)      | 1.983 (5)      | 1.987 (4)      | 2.147 (3)      |
| Fe1'—N3G (Å)    | —            | —                  | —                  | —              | —              | —              | —              | —              | —              | 2.100 (6)      | 2.116 (6)      | —              |
| Fe1'—N3H (Å)    | —            | —                  | —                  | —              | —              | —              | —              | —              | —              | 2.113 (6)      | 2.124 (5)      | —              |
| Fe1'—N3I (Å)    | —            | —                  | —                  | —              | —              | —              | —              | —              | —              | 2.157 (7)      | 2.158 (7)      | —              |
| Fe1'—N4G (Å)    | —            | —                  | —                  | —              | —              | —              | —              | —              | —              | 2.170 (7)      | 2.208 (6)      | —              |
| Fe1'—N4H (Å)    | —            | —                  | —                  | —              | —              | —              | —              | —              | —              | 2.206 (8)      | 2.211 (7)      | —              |
| Fe1'—N4I (Å)    | —            | —                  | —                  | —              | —              | —              | —              | —              | —              | 2.144 (6)      | 2.172 (6)      | —              |
| Fe2'—N5G (Å)    | —            | —                  | —                  | —              | —              | —              | —              | —              | —              | 2.200 (8)      | 2.238 (7)      | —              |
| Fe2'—N5H (Å)    | —            | —                  | —                  | —              | —              | —              | —              | —              | —              | 2.164 (5)      | 2.187 (5)      | —              |
| Fe2'—N5I (Å)    | —            | —                  | —                  | —              | —              | —              | —              | —              | —              | 2.177 (5)      | 2.193 (4)      | —              |
| Fe2'—N6G (Å)    | —            | —                  | —                  | —              | —              | —              | —              | —              | —              | 2.097 (5)      | 2.116 (5)      | —              |
| Fe2'—N6H (Å)    | —            | —                  | —                  | —              | —              | —              | —              | —              | —              | 2.117 (5)      | 2.122 (5)      | —              |
| Fe2'—N6I (Å)    | —            | —                  | —                  | —              | —              | —              | —              | —              | —              | 2.116 (5)      | 2.134 (5)      | —              |

### S3. Physical Measurements

#### S3.1. Characterisation of ligand L

The  $^1\text{H}$  NMR and  $^{13}\text{C}$  NMR (Figures S1,S2) confirmed the formation of ligand L. The high-resolution ESI-MS (HR ESI-MS) of L identified  $m/z$  values at 511.2010 and 533.1523, which correspond to  $[\text{L}+\text{H}]^+$  and  $[\text{L}+\text{Na}]^+$  respectively (Figure S3). The isotopic pattern for both charged species of L is in good accordance with their simulated isotopic distributions.

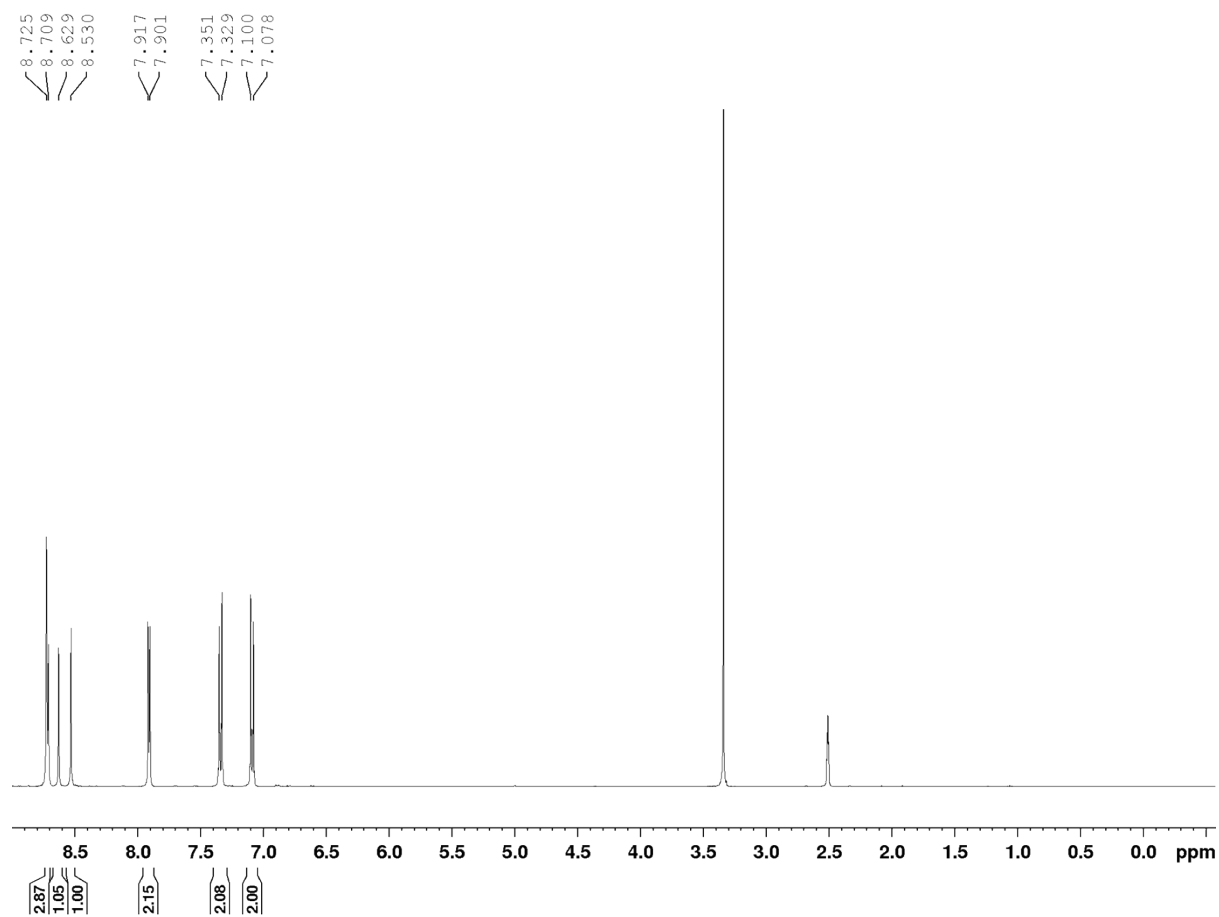

**Figure S1.**  $^1\text{H}$  NMR spectrum of L (DMSO- $d_6$ , 400MHz)



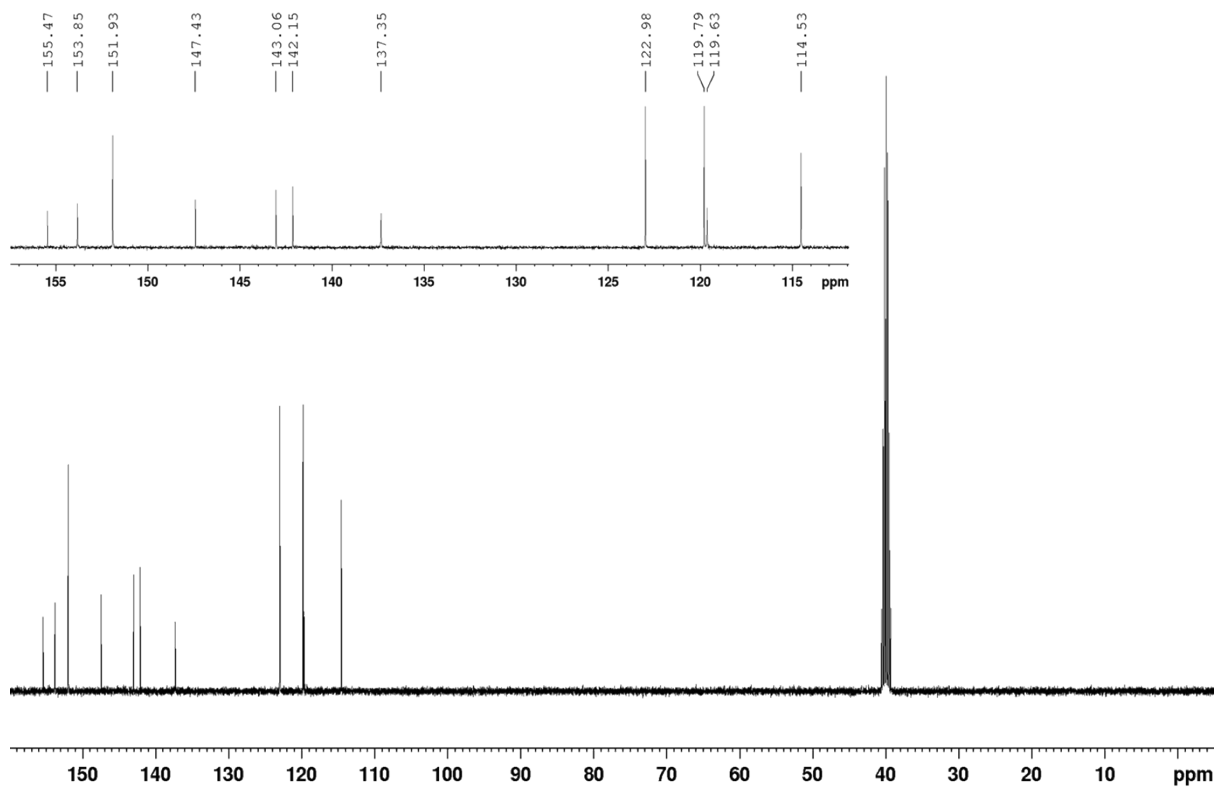

**Figure S2.**  $^{13}\text{C}$  NMR spectrum of **L** ( $\text{DMSO-d}_6$ , 100MHz).

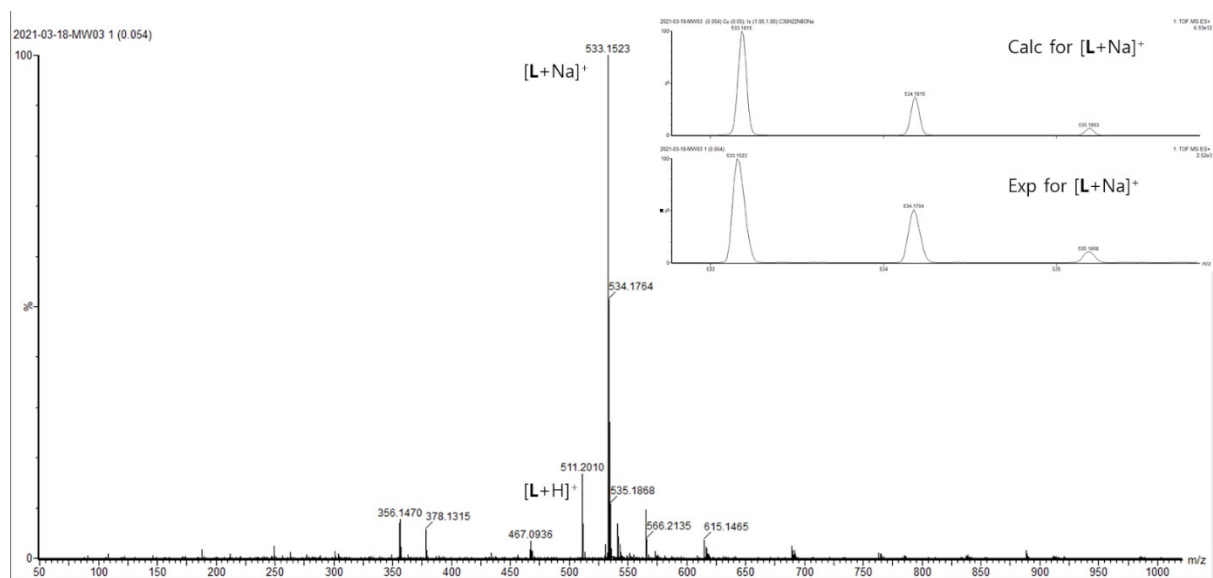

**Figure S3.** HR ESI(+)-MS spectrum of **L** in methanol. The inset identifies the isotopic pattern of  $[\text{L}+\text{Na}]^+$  (bottom) with simulated pattern (top).

### S3.2. Characterisation of 1·6H<sub>2</sub>O

The HR ESI-MS of **1** gave  $m/z$  values at 410.5572, 576.4459 and 908.1909 which corresponds to  $[\text{Fe}_2\text{L}_3]^{4+}$ ,  $[\text{Fe}_2\text{L}_3(\text{BF}_4)]^{3+}$  and  $[\text{Fe}_2\text{L}_3(\text{BF}_4)_2]^{2+}$  respectively (Figure S4). The isotopic patterns of all charged species of the metalloligand are in good agreement with their simulated isotopic distributions. SEM-EDS analysis of **1**, the EDS spectrum confirmed the presence of C, N, F, O and Fe (Figure S5). Simultaneous thermal analysis (STA) was consistent with the finding from the CHN experimental finding of 6 H<sub>2</sub>O molecules in solvated **1** (Figure S6).

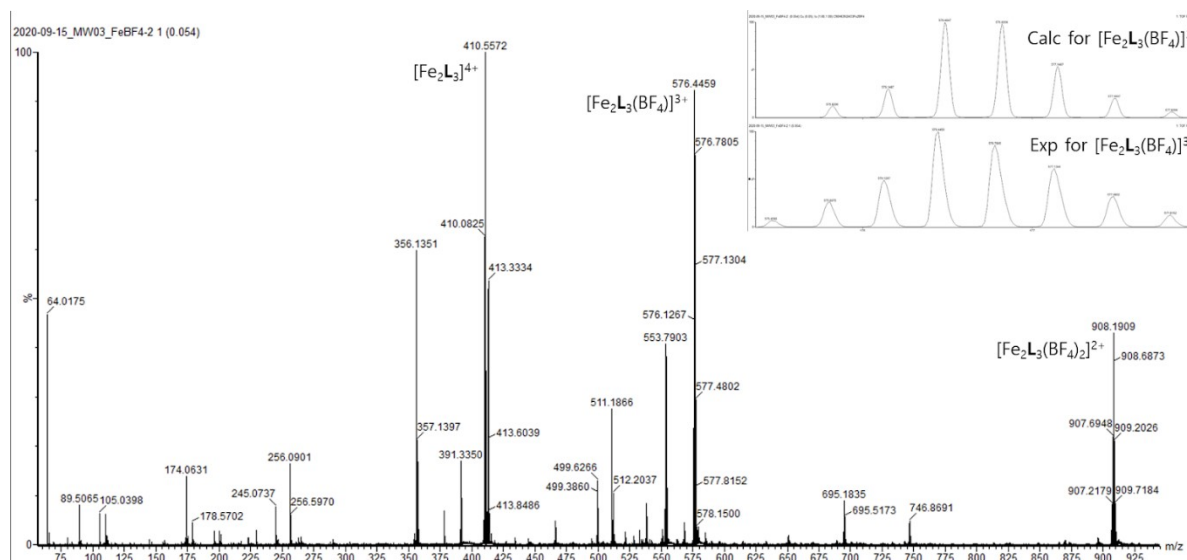

**Figure S4.** HR ESI(+)-MS spectrum of  $[\text{Fe}_2\text{L}_3(\text{BF}_4)_4]$  in acetonitrile. The inset shows the isotopic pattern of  $[\text{Fe}_2\text{L}_3(\text{BF}_4)]^{3+}$  (bottom) with simulated pattern (top).

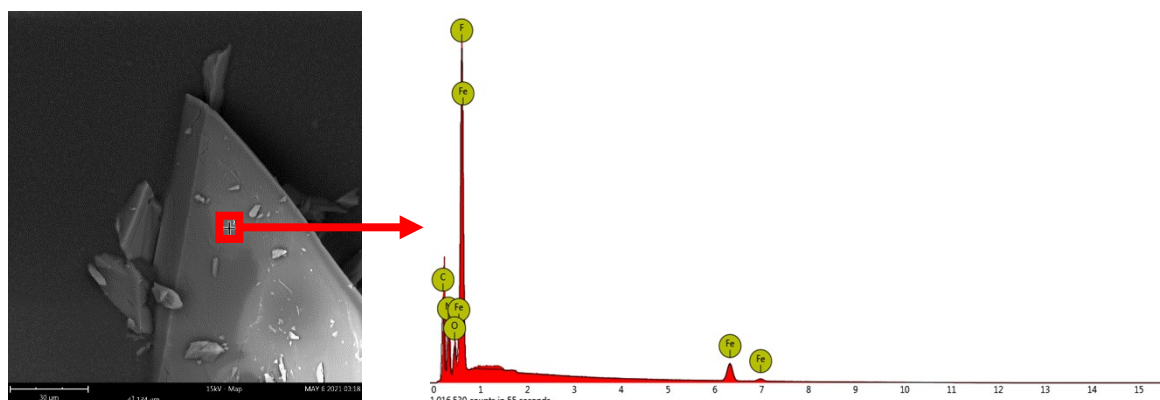

**Figure S5.** SEM image of **1** and corresponding EDS analysis results.

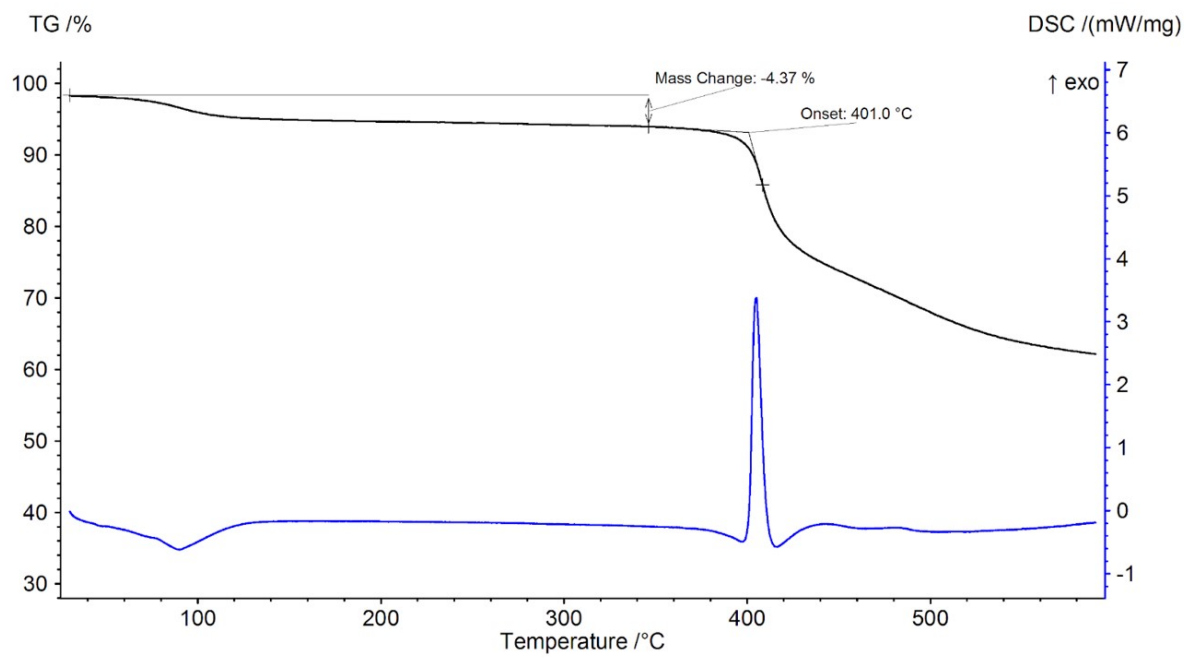

**Figure S6.** Simultaneous thermal analysis plot for  $1 \cdot 6\text{H}_2\text{O}$ .

## S4. Mössbauer, SQUID and LIESST analysis of **1**

### S4.1. Mössbauer analysis of **1**·6H<sub>2</sub>O and desolvated **1**

The Mössbauer experiments at 78 and 298 K for the solvated and desolvated samples demonstrated complete occupancy of the Fe(II) centres in LS-LS state at 78 K and HS-HS at 298 K, corroborating the SQUID results for structures which were allowed to cool slowly (Figure S7). Each of the Mössbauer spectra measured at 78 and 298 K for **1**·6H<sub>2</sub>O and desolvated **1** revealed one quadrupole-split doublet each. At 78 K, **1**·6H<sub>2</sub>O gives rise to a narrow doublet (quadrupole-splitting Q.S. = 0.20 mm s<sup>-1</sup> and isomer shift I.S. = 0.51 mm s<sup>-1</sup>), similar to that for desolvated **1** which displays a narrow doublet (Q.S. = 0.20 mm s<sup>-1</sup> and I.S. = 0.38 mm s<sup>-1</sup>), both of which arise from the LS state. At 298 K, **1**·6H<sub>2</sub>O displays a wide doublet (Q.S. = 0.76 mm s<sup>-1</sup> and I.S. = 0.99 mm s<sup>-1</sup>), as does desolvated **1** (Q.S. = 0.75 mm s<sup>-1</sup> and I.S. = 0.88 mm s<sup>-1</sup>), indicating full occupancy of the HS state.

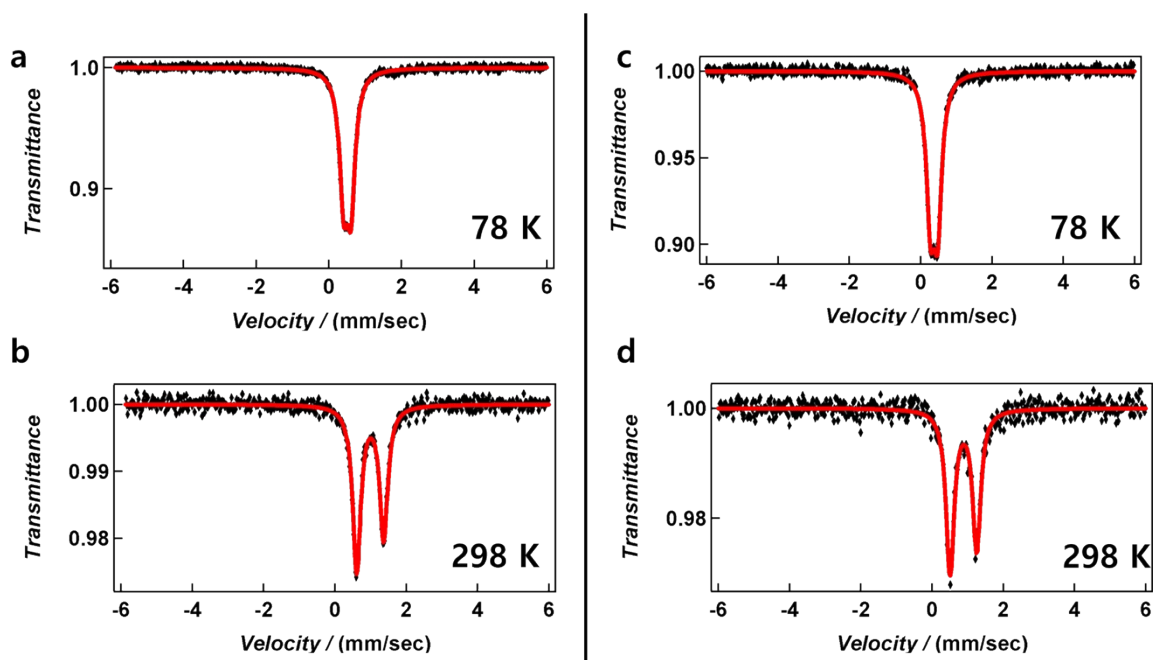

**Figure S7.** Mössbauer spectra of; a) **1**·6H<sub>2</sub>O 78 K, b) **1**·6H<sub>2</sub>O 298 K, c) desolvated **1** at 78 K and d) desolvated **1** at 298 K.

### S4.2. LIESST measurements of **1**·6H<sub>2</sub>O and desolvated **1**

LIESST experiments were carried out for both **1**·6H<sub>2</sub>O and desolvated **1** (Figure S8) to determine the extent of the photoexcitation in response to red (800 nm) and green (532 nm) light. The solvated sample showed a small increase in  $\chi_M T$  for both light sources on irradiation at 5 K. Upon heating following photoexcitation with the red laser, the  $\chi_M T$  value continued to increase up to 0.86 cm<sup>3</sup> K mol<sup>-1</sup> at 21 K, then decreased upon further heating, with a  $T_{\text{LIESST}}$  value of 36 K. The sample's response to the green laser was similar, though more pronounced, rising to a peak of 0.91 cm<sup>3</sup> K mol<sup>-1</sup> at 23 K, with a  $T_{\text{LIESST}}$  value of 42 K. The behaviour of both photoexcited samples beyond the critical temperature were similar, though distinct from the non-photoexcited 1 K min<sup>-1</sup> heating behaviour. Both curves intersect with the peak of the 1 K min<sup>-1</sup> **1**·6H<sub>2</sub>O heating curve at its low temperature peak, before deviating with a higher  $\chi_M T$ . The LIESST curves again intersect the thermal heating curve, but have a later onset of spin transition. This may be evidence that photoexcitation causes a phase change in the solvated

sample, which returns to the HS state via a separate mechanism. LIESST experiments performed on desolvated **1** also displayed a photomagnetic response, with maximum  $\chi_M T$  values of  $1.43 \text{ cm}^3 \text{ K mol}^{-1}$  at 21 K and  $1.84 \text{ cm}^3 \text{ K mol}^{-1}$  at 22 K for red and green light respectively. The  $T_{\text{LIESST}}$  value calculated for green light of 42 K exceeded that found for red light which occurred at 36 K, in the same pattern as that for  $\mathbf{1} \cdot 6\text{H}_2\text{O}$ . Upon further heating, the magnetic susceptibility further decayed, until the curves rejoin the curve of the desolvated **1**  $\text{K min}^{-1}$  heating cycle of **1**.

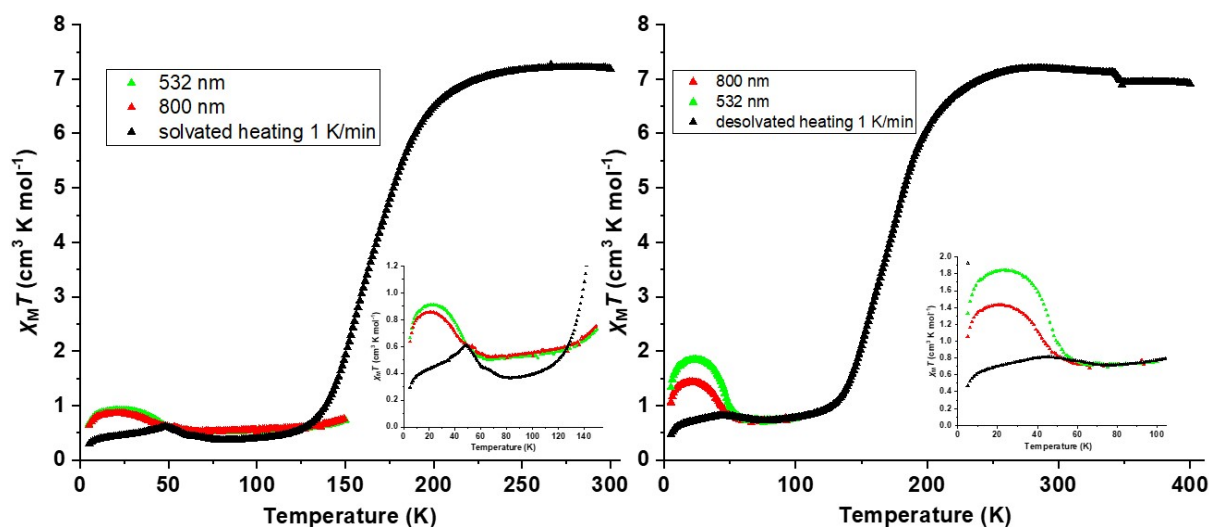

**Figure S8.** Plot of LIESST results for **1**. a) LIESST results for  $\mathbf{1} \cdot 6\text{H}_2\text{O}$  with the  $1 \text{ K min}^{-1}$  heating cycle shown for reference. b) LIESST results for desolvated **1**, with the  $1 \text{ K min}^{-1}$  heating cycle shown for reference.

## S5. Variable temperature Raman spectroscopy

Raman spectroscopy was carried out on  $1 \cdot 6\text{H}_2\text{O}$ , yielding weak data in the region below  $1100\text{ cm}^{-1}$  and significant peaks between  $1100\text{-}1800\text{ cm}^{-1}$  (Figure S9). Vibrations involving the metal ion are typically observed in the region  $100\text{-}1000\text{ cm}^{-1}$ , while peaks arising at  $1000\text{-}2000\text{ cm}^{-1}$  are more likely related to ligand vibrations.<sup>2</sup> At all temperatures, the strongest peak arose at  $1624\text{ cm}^{-1}$ , attributed to N=CH stretching in the imidazole and imine groups. The peak observed at  $1606\text{ cm}^{-1}$  in the 301 K spectrum may be attributed to ring and C-H stretching in the aromatic rings, and the diminishing of this peak with decreasing temperature may indicate less steric freedom for this vibration as the material adopts the LS state. A short peak, consistent with aromatic C=C stretching is observed at  $1557\text{ cm}^{-1}$  at 301 K, which has increased intensity at lower temperatures. An additional peak arises neighbouring this at  $1548\text{ cm}^{-1}$  at 150 K and 100 K, providing a clear marker of the LS state, and may be attributed to the same vibrational mode, altered by transition to the LS state. After cooling to 100 K, a measurement was performed using 10% laser power (8.9 mW), which provided a spectrum more consistent with that measured at 301 K than 100 K, indicating that photoexcitation brings about the metastable HS state observed in LIESST studies (Figure S8).

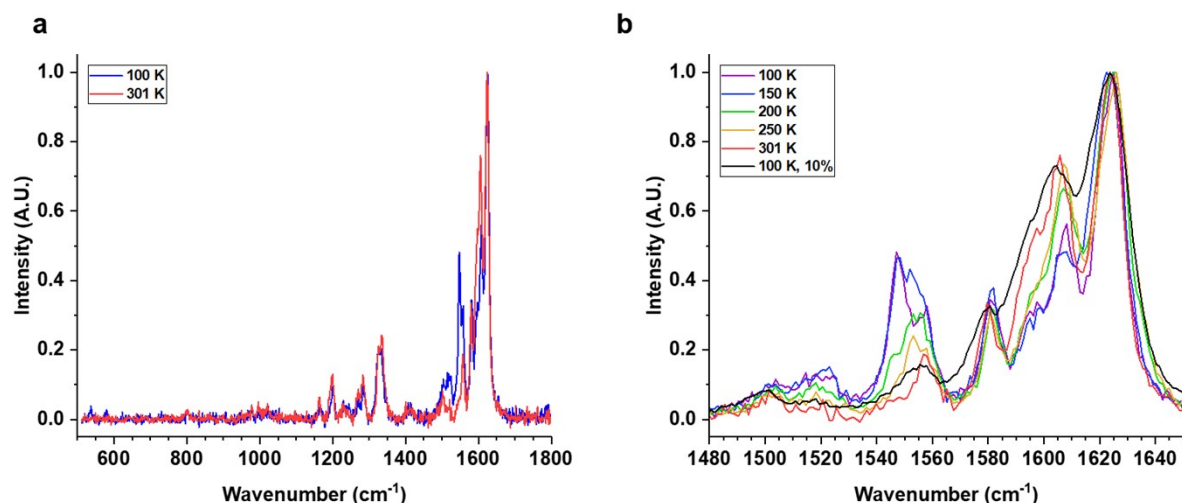

**Figure S9.** Variable temperature Raman data for  $1 \cdot 6\text{H}_2\text{O}$  at the cooling rate of  $1\text{ K min}^{-1}$ . a) Full spectral width at 100 K (blue) and 301 K (red). b) Close-up of the region  $1480\text{-}1650\text{ cm}^{-1}$ , which showed the most variation across the temperature series. 1% laser power (0.89 mW) was used to collect spectra at 300 K (red), 250 K (orange), 200 K (green), 150 K (blue), 100 K (purple), and 10% laser power (8.9 mW) was used at 100 K (black) to cause the LIESST effect.

## S6. Intermolecular interactions of 1-MeCN

**Table S4.** Contacts along the 1D chain formed by the terminal pyridine groups of ligand A at the Fe1 end of the helicate. These contacts join helicates of opposite chirality through  $\pi$ - $\pi$  stacking between A pyridines and N $\cdots$ HC hydrogen bonds between pyridyl N atoms and imidazole CH groups of ligand C.

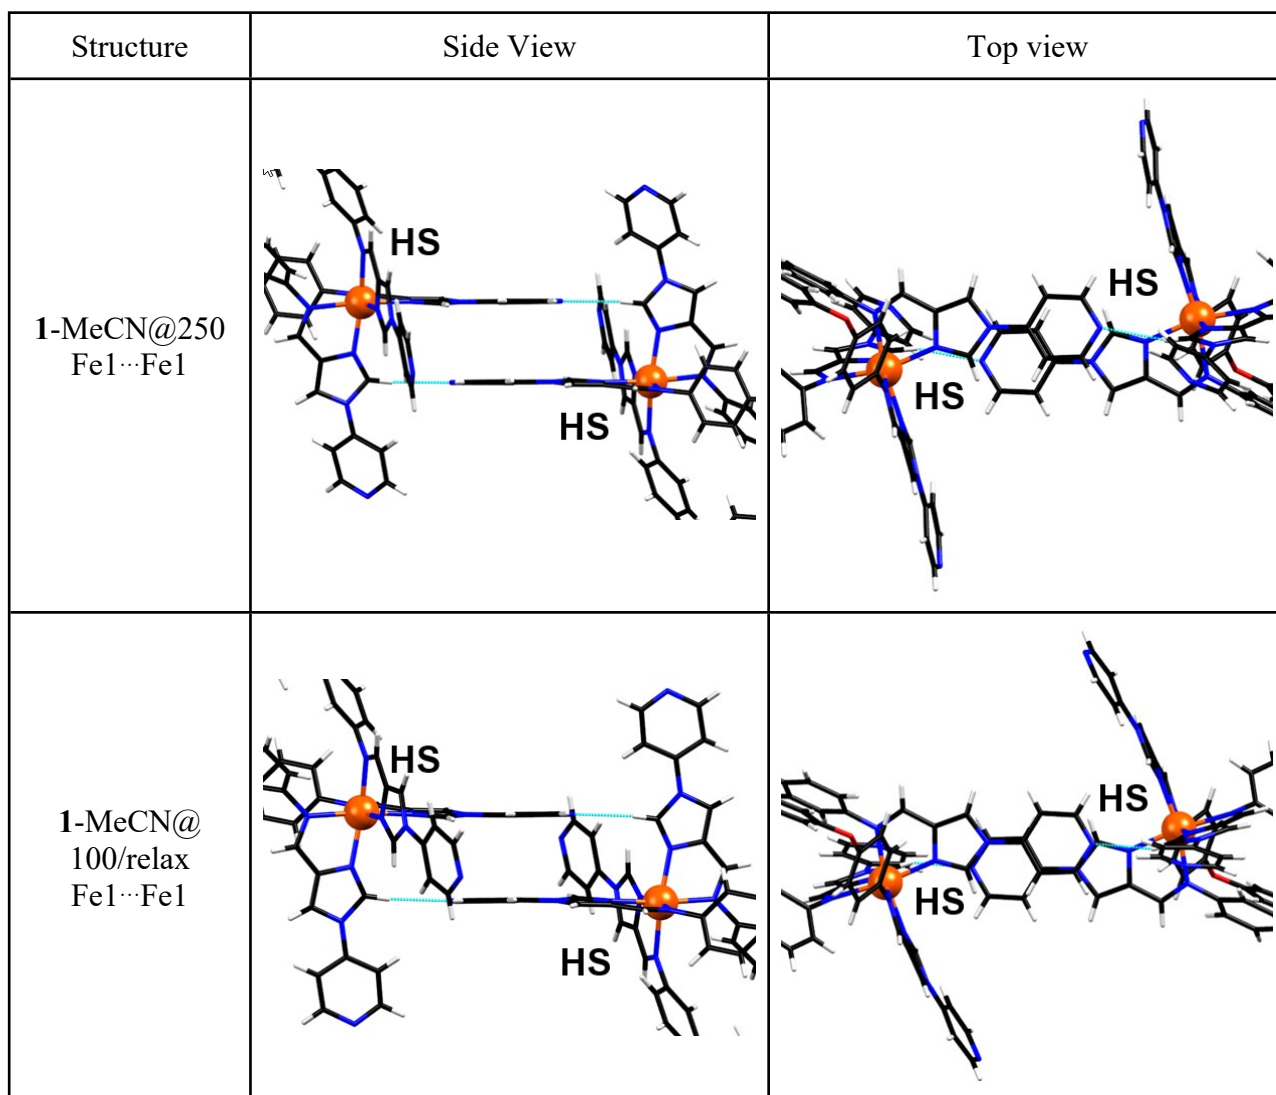

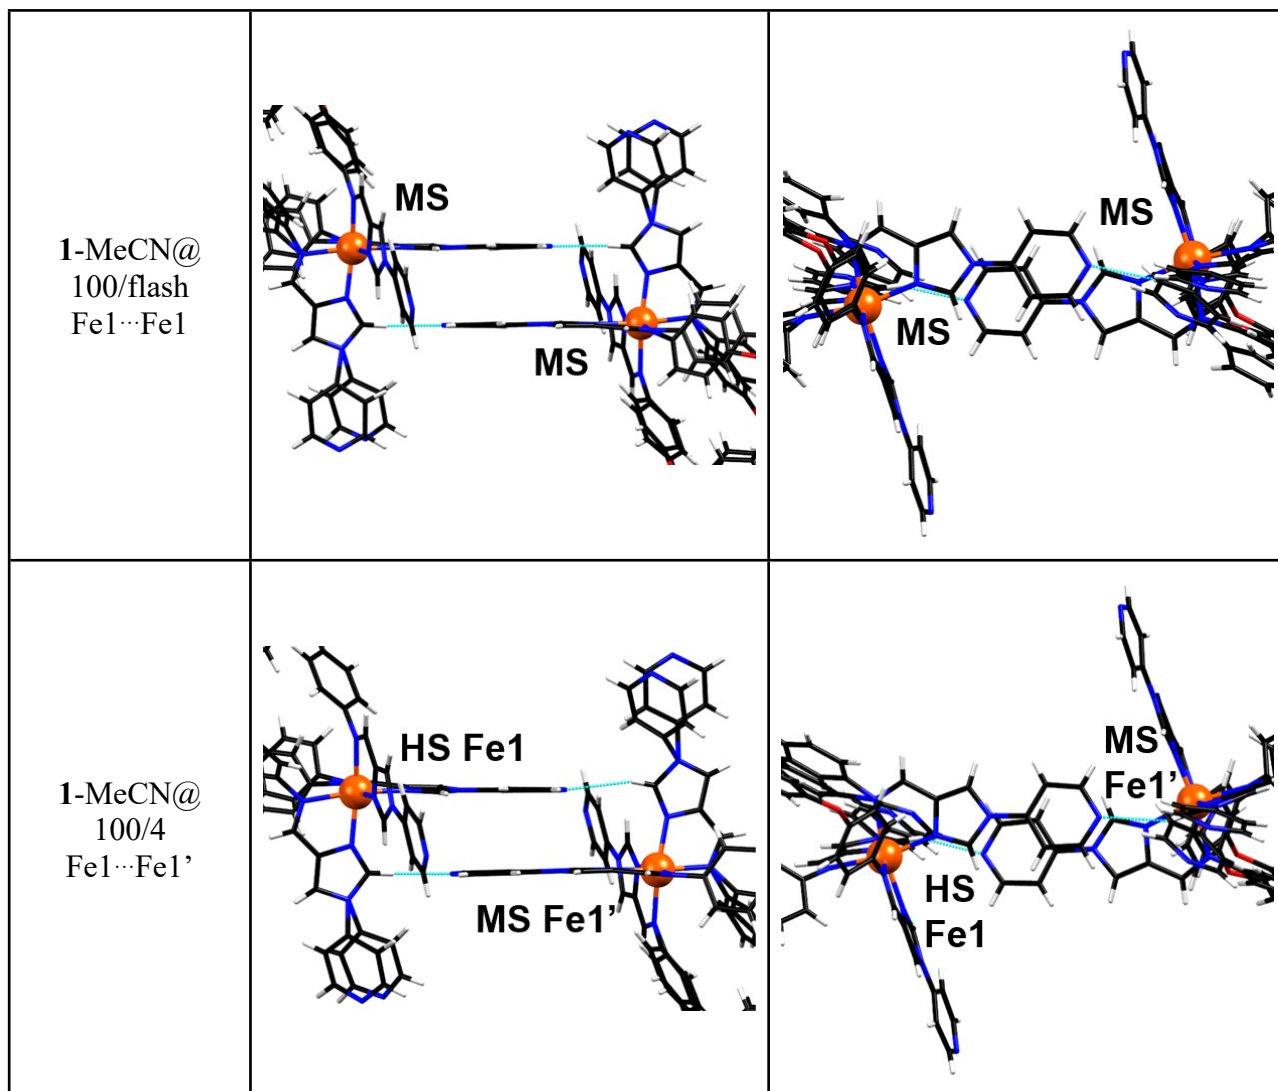



**Table S5.** Contacts along the 1D chain formed by the terminal pyridine groups of ligand **A** at the Fe2 end of the helicate. These contacts join helicates of opposite chirality through  $\pi$ - $\pi$  stacking between **A** pyridines, and N $\cdots$ HC hydrogen bonds between pyridyl N atoms and imidazole CH groups of ligand **B**.

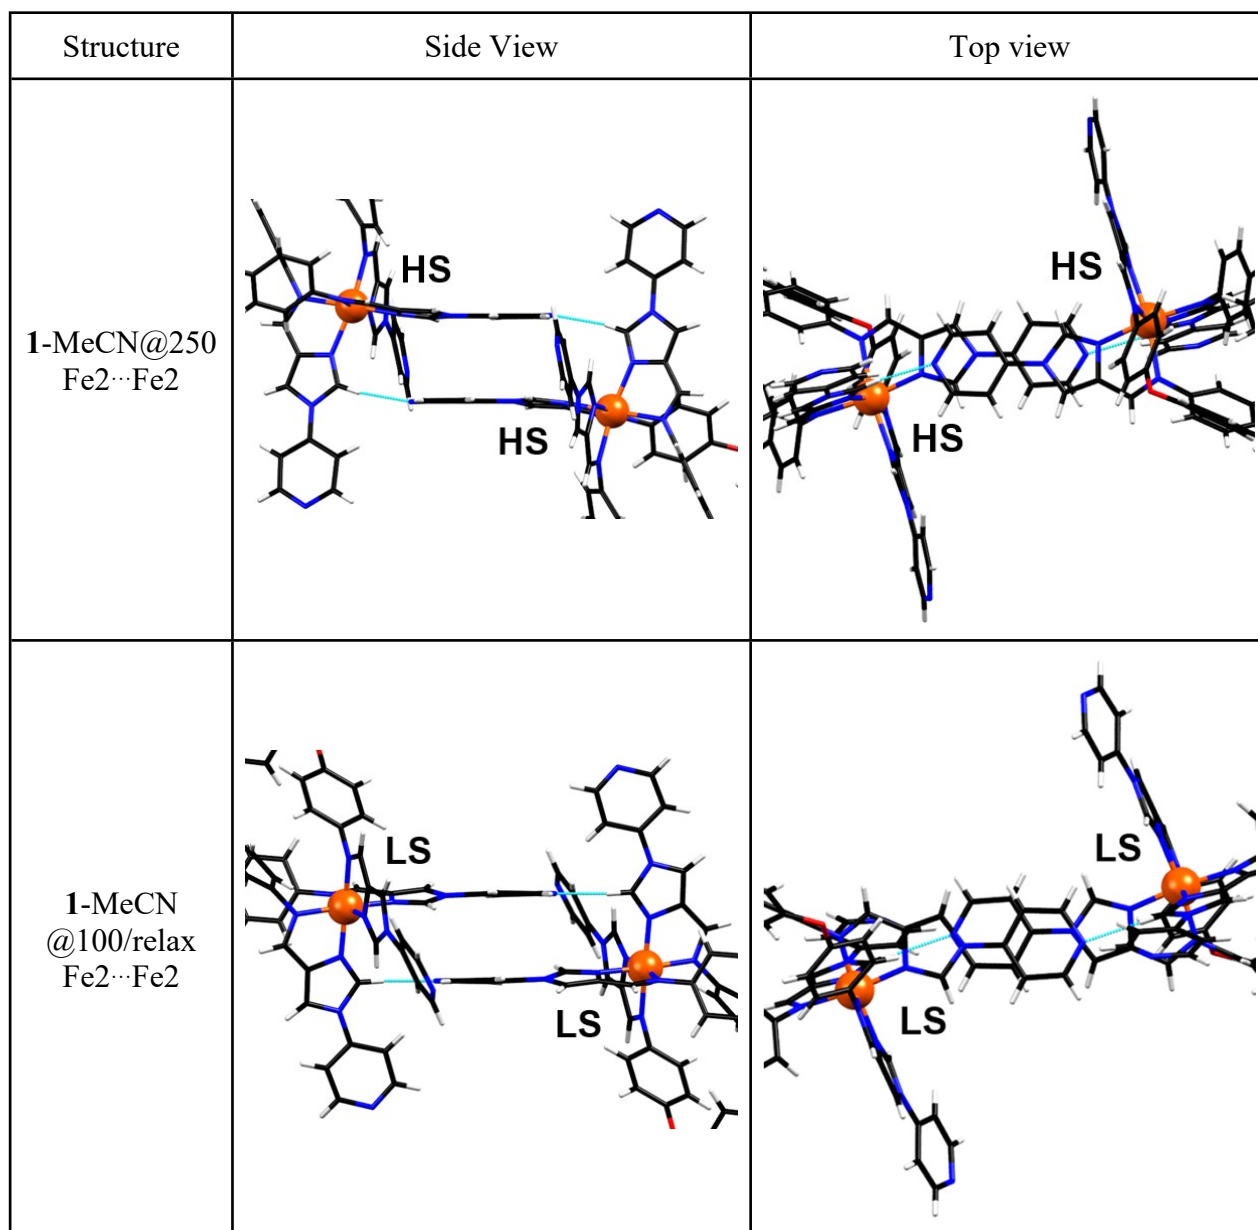

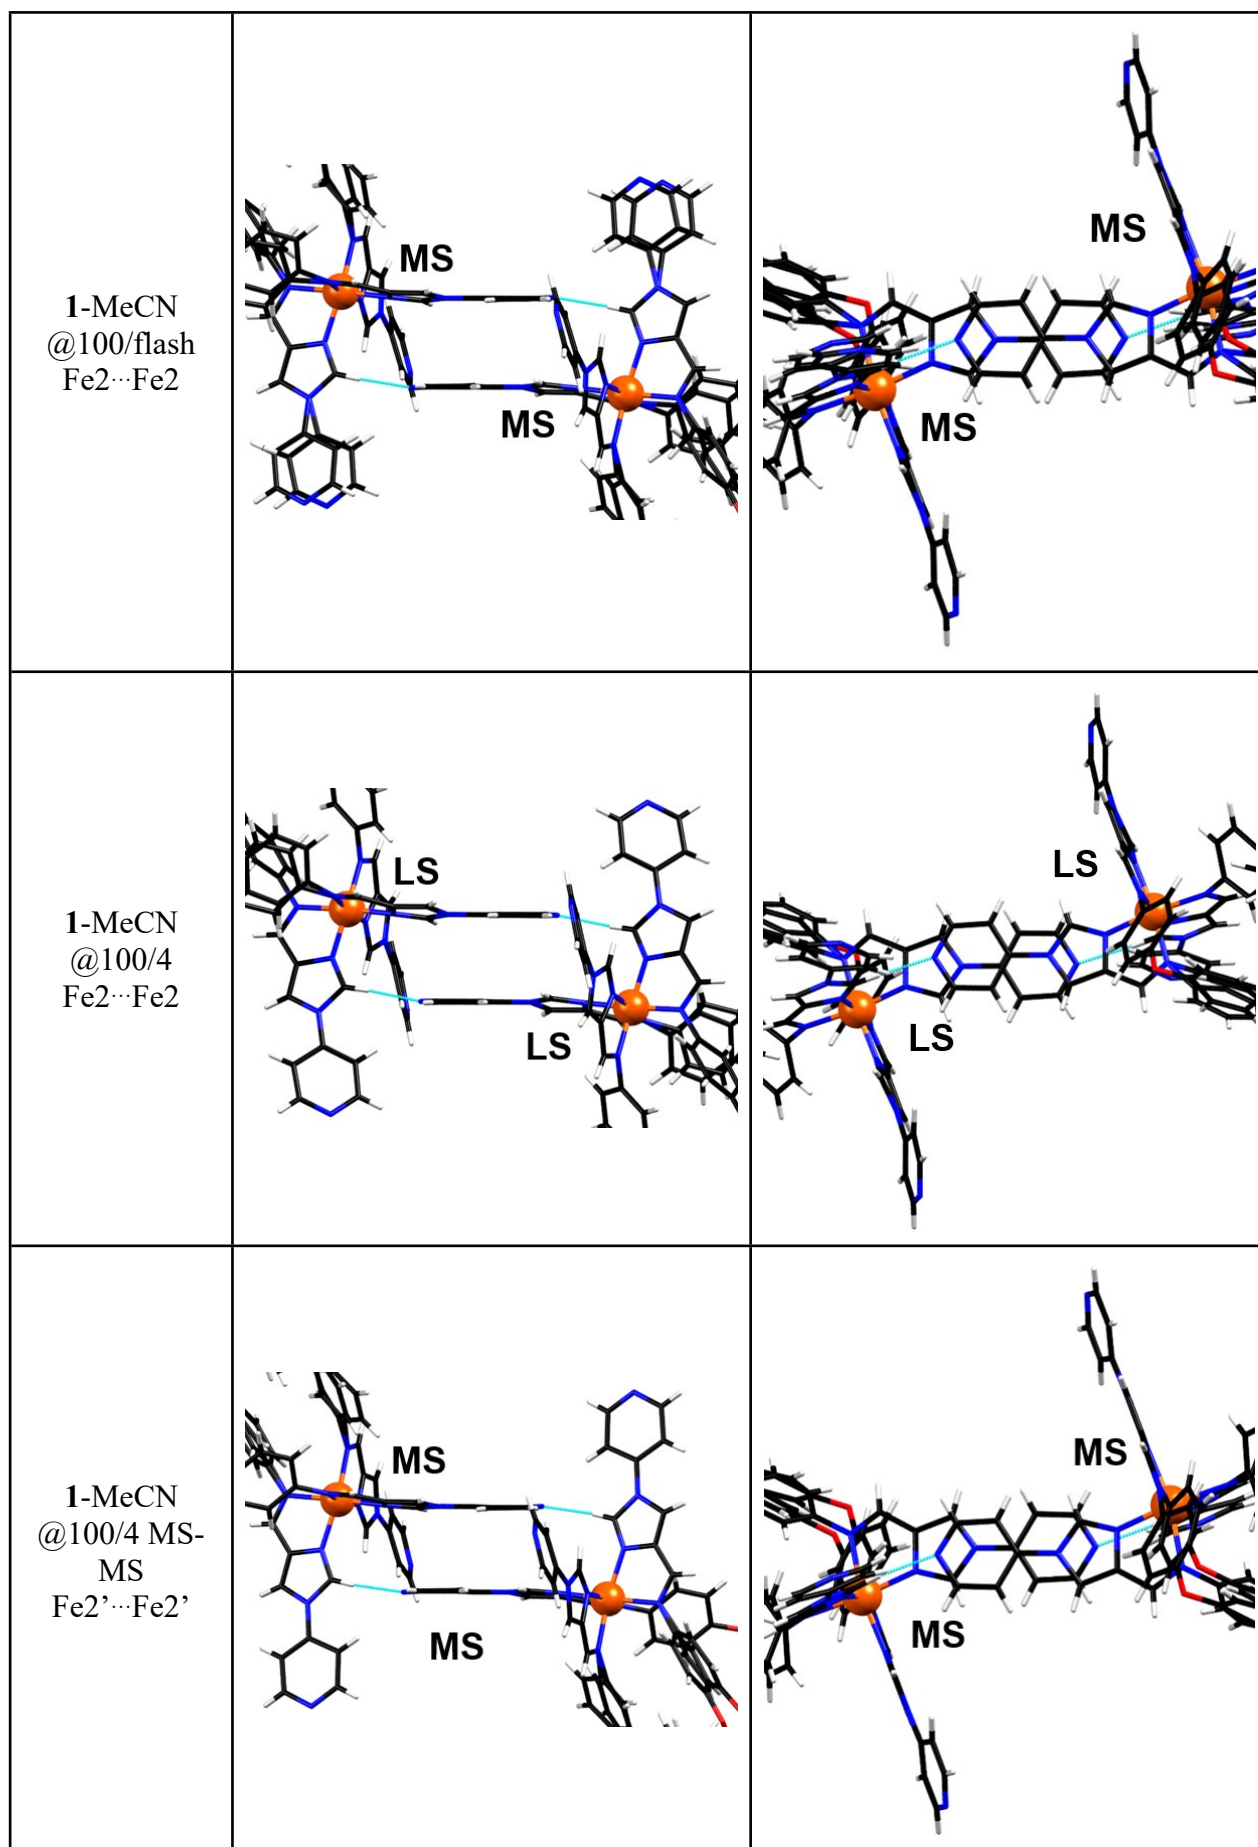

**Table S6.** Contacts between the linker segment of ligand **A** and the terminal pyridine of ligand **C** on an adjacent helicite. Ligand **A** is shown in red, **B** in blue and **C** in green, with secondary disordered parts shown in lighter colours. HS Fe centres are shown in orange, LS Fe in purple and MS Fe in grey.

| Structure         | A linker to C pyridine contact                                                                                                                                                                                                                                                                                                                                                                                                                                                                                                                                               |
|-------------------|------------------------------------------------------------------------------------------------------------------------------------------------------------------------------------------------------------------------------------------------------------------------------------------------------------------------------------------------------------------------------------------------------------------------------------------------------------------------------------------------------------------------------------------------------------------------------|
| 1-MeCN@250        | 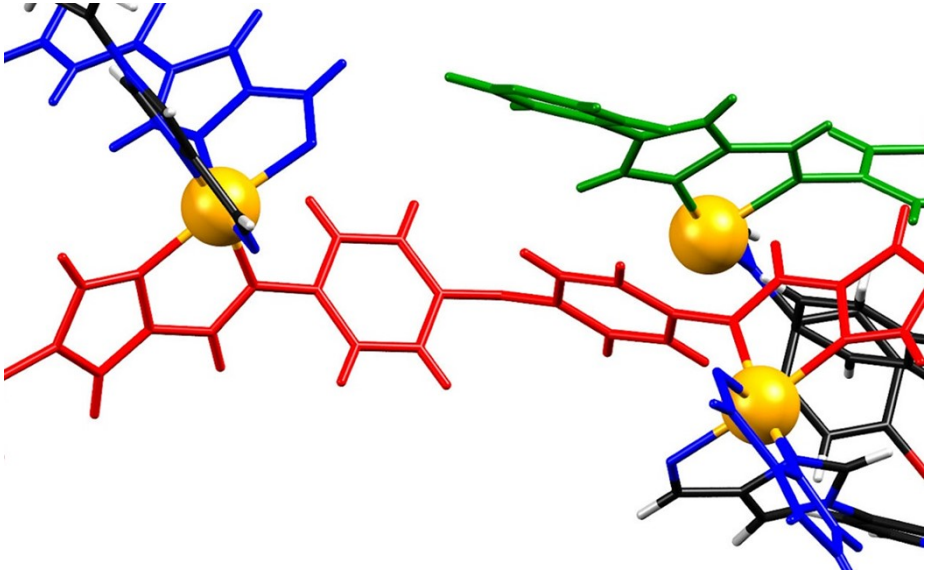 <p>The image shows a molecular structure with a central red linker segment. To its left, a blue pyridine ring is coordinated to a yellow HS Fe center. To its right, a green pyridine ring is coordinated to another yellow HS Fe center. The linker segment is shown in red, and the pyridine rings are in blue and green. The structure is shown in a perspective view, highlighting the spatial arrangement and potential interactions between the linker and the pyridine rings.</p> |
| 1-MeCN @100/relax |  <p>The image shows a molecular structure similar to the one above, but with a different arrangement. The central red linker segment is shown in red. To its left, a purple LS Fe center is coordinated to a blue pyridine ring. To its right, a yellow HS Fe center is coordinated to a blue pyridine ring. The structure is shown in a perspective view, highlighting the spatial arrangement and potential interactions between the linker and the pyridine rings.</p>                |

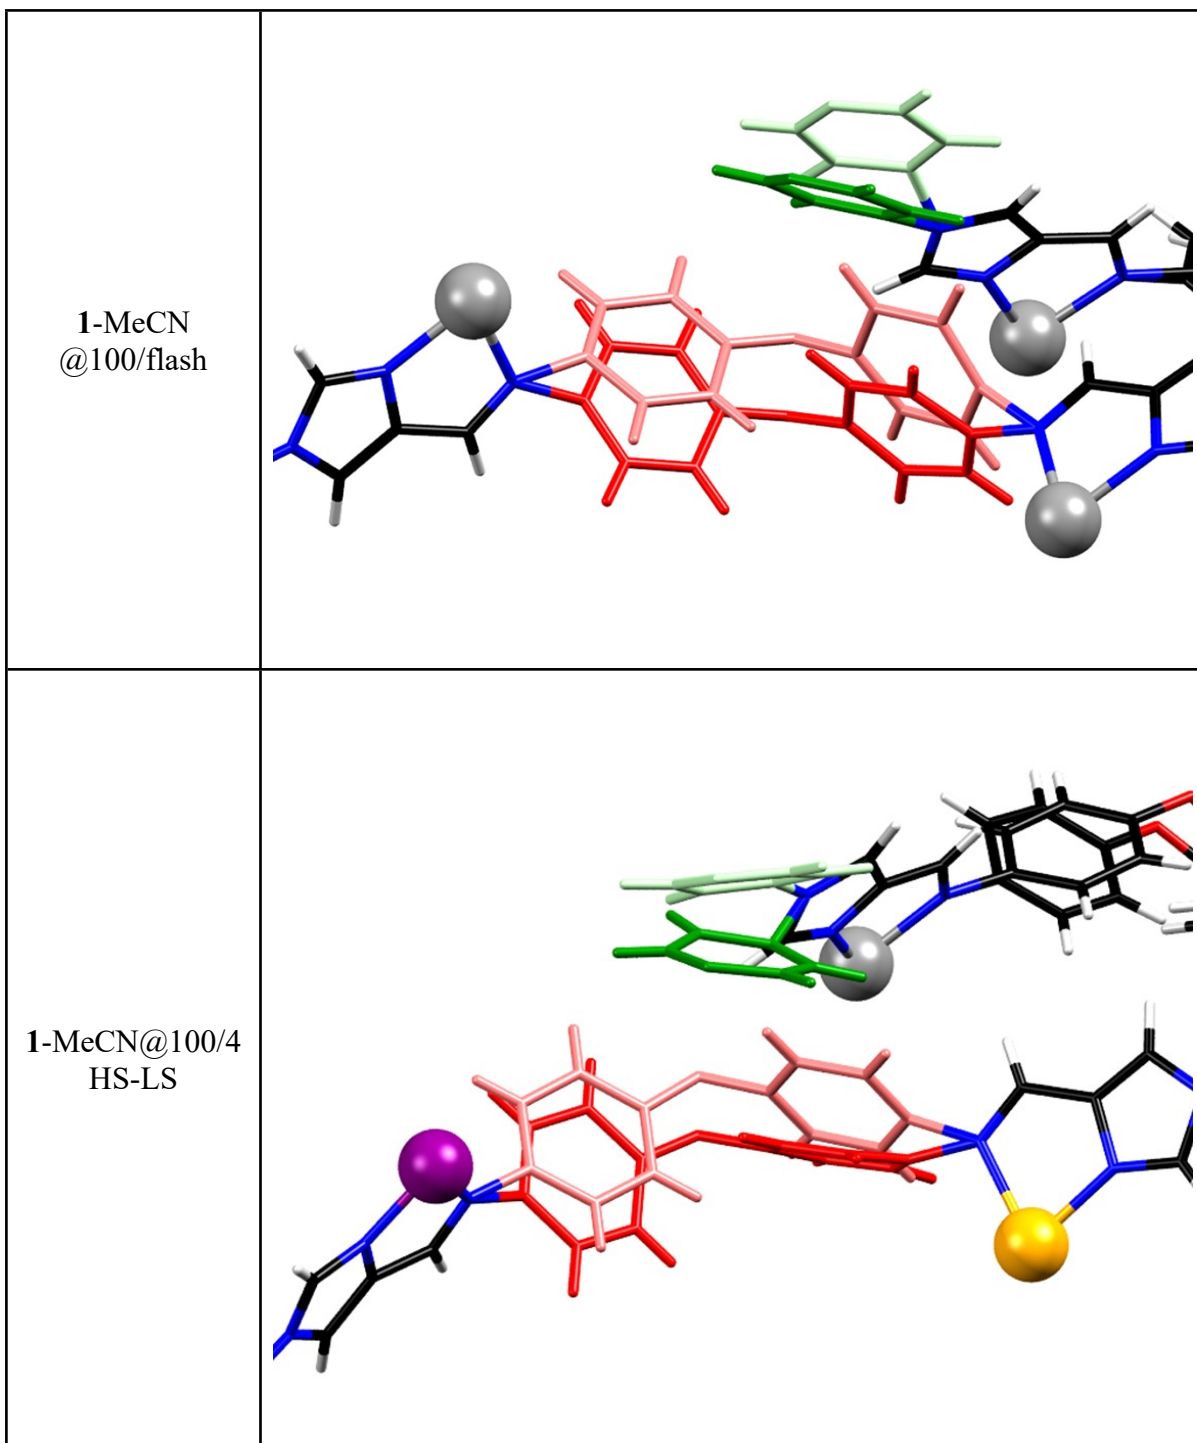

1-MeCN@100/4  
MS-MS

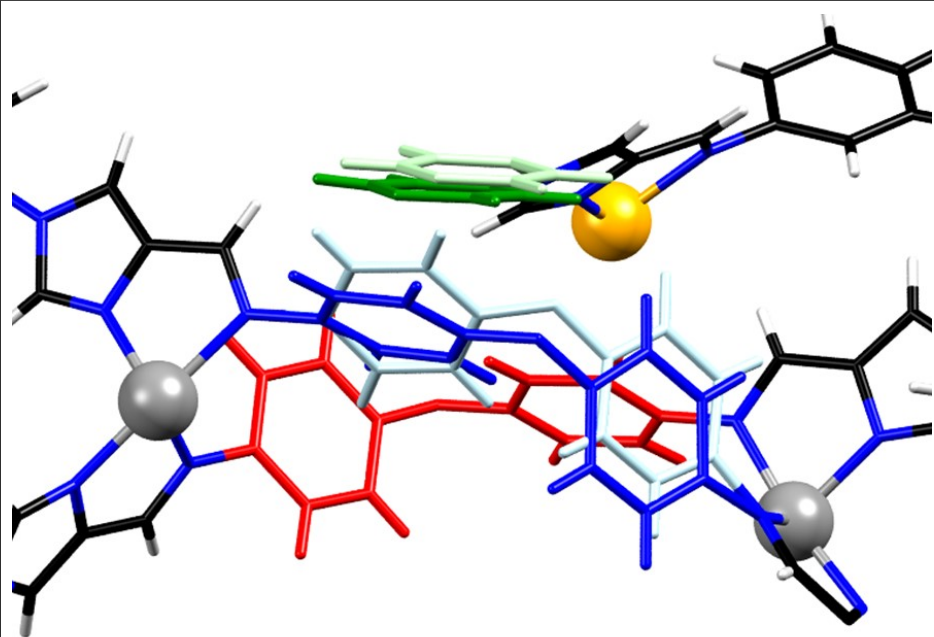

## S7. Scaling of crystal packing coefficient and molecular volume.

Crystal packing coefficient and molecular volume calculations were carried out in Olex2.<sup>3</sup> For structures exhibiting no disorder, the calculation was straightforward, and performed with a selection of all atoms in the helicate structure including H atoms. Where orientational disorder was present, using the same simple method will artificially increase the value of each result, since occupancies of various parts are not accounted for. To amend this, all atoms in the helicate designated part 0 and part 1 (0/1) were selected, then the volume and density parameters were recorded. The same process was repeated for part 0 and part 2 (0/2) atoms. The volume of the [0/1] and [0/2] helicates were scaled by the occupancies of all disordered moieties, according to:

$$occ(P1) = \frac{[occ(M1, P1) + occ(M2, P1) + \dots + occ(Mi, P1)]}{[occ(M1, P1) + occ(M2, P1) + \dots + occ(Mi, P1)] + [occ(M1, P2) + occ(M2, P2) + \dots + occ(Mi, P2)]}$$

$$occ(P2) = \frac{[occ(M1, P2) + occ(M2, P2) + \dots + occ(Mi, P2)]}{[occ(M1, P1) + occ(M2, P1) + \dots + occ(Mi, P1)] + [occ(M1, P2) + occ(M2, P2) + \dots + occ(Mi, P2)]}$$

Where:

$occ(P1)$  and  $occ(P2)$  denote the scaled occupancies of [0/1] and [0/2] respectively

$occ(Mi, P1)$  and  $occ(Mi, P2)$  refer to the occupancies of the  $i$ th disordered moiety on parts 1 and 2 respectively.

The final value for each parameter (Y) was calculated by:

$$Y = [occ(P1) \times Y(0/1)] + [occ(P2) \times Y(0/2)]$$

## S8. Helicate structural parameters.

In order to quantify the reorientation of key parts of the dinuclear triple helicate units, and examine the correlative effects between molecular reconfiguration and the crystal structure of **1**-MeCN, several structural parameters have been examined, similar to our previous work.<sup>4-6</sup> Linker ring torsions (S8.1) were used to describe the orientations of the benzene groups within the linker moieties of each ligand. Pitch and yaw angles (S8.2) were taken in mutually orthogonal projections for each chelate ring in the structure, describing the side-to-side twisting and the back-and-forth rocking of each chelate group relative to the interhelical axis. Additionally, the deviation between the interhelical axis the terminal pyridine moieties (secondary bond axis, S8.3) was used to show to what degree the terminal groups are spread. This suite of geometric parameters allows for the determination of molecular dynamics related to SCO, and correlation with lattice parameters can be used to show how molecular reconfigurations and phase changing dynamics are entwined.

The helicate can be divided into components, with the orientation of each component used to provide insight into the overall conformation achieved by different parts of each ligand. The linker moieties were modelled using linker torsion (S8.1), which indicates the degree of twist of each of the benzene rings, relative to a reference plane describing the linker segment overall. The angle between the intermetallic axis and the axis defined by the two coordinating N atoms in each chelate ring can be taken, and this was further deconstructed into pitch and yaw angles to more specifically indicate the direction of the reorientations in the chelate groups. By a similar methodology, angles between the intermetallic axis and the secondary bond axes were calculated. Here, the secondary bond axis refers to the interval between N atoms in terminal pyridines, and the C atoms opposite in the ring (N1 - C3 or N8 - C28), which reflects the direction in which a coordinate bond from the secondary donor sites may form with respect to the intermetallic axis (S8.3). This allows for quantification of the degree of spreading of the terminal pyridyl groups. Since the coordinating imidazoleimine and the terminal pyridine are both rigid groups, the spread of the secondary bond axes is closely linked to the orientation of the internal chelating section of the ligand. All of these parameters are defined such that they refer to an internal structural feature for consistent comparison; either the intermetallic axis, or in the case of linker ring torsions, a reference plane describing the linker orientation.

Following analysis of the structural measurements (Table S7) we are able to suggest a mechanism by which slow cooling allows the lattice of **1** to undergo a transition to [HS-LS] in the full population of helicate molecules in the solid, while faster cooling inhibits this transformation. Several ligand reconformations are demonstrated in the **1**-MeCN@100/relax structure, which differ significantly from the 250 K structure (Table S7). One key feature is that the linker segment of ligand **A** repositions with a transition of Fe2 to LS. This occurs due to the rearrangement of the chelate group of **A** at Fe2, which changes the pitch to negative, and causes the benzene rings in **A** to exchange torsion values (Table S7). This, along with motion towards the terminal **C** pyridyl at Fe1 of an adjacent helicate, may induce a transition of the adjacent Fe1 to LS, due to the semi-rigid connection between the terminal pyridine and chelating imidazoleimine. This is demonstrated in the kinetically trapped **1**-MeCN@100/4 structure through the low Fe1' octahedral distortion parameters. Additionally, the rearrangement of the **C** imidazole group skews the orientation of the CH group associated with the terminal N...HC hydrogen bond, weakening the contact between Fe1 centres along the 1D chains, which may contribute to the loss of inversion symmetry across these sites (Table S4). In the fully relaxed structure, further reorientation in ligand groups puts into effect an overall supramolecular rearrangement. Transitioning the bulk of helicates in the solid to the [HS-LS] state instigates a significant decrease in the magnitude of **B** pitch at both ends of the helicate

which allows terminal pyridyl groups of **B** to draw inwards and lower the secondary bond axis values of **B**. This in turn leads to the compression of 1D chains towards each other along the *b*-axis.

**Table S7.** Selected geometric parameters describing the orientations of helicate components. 1 K min<sup>-1</sup> values are shown to compare with those obtained at the extreme ends of the temperature range.

| Structure<br>(1-MeCN@...) | *A torsion <sup>a</sup><br>(°)        | A Pitch <sup>b</sup><br>(°)          | A Yaw <sup>c</sup><br>(°)             | B Pitch <sup>b</sup><br>(°)              | B Yaw <sup>c</sup><br>(°)             | *A<br>Secondary<br>bond axis <sup>d</sup><br>(°) | *B<br>Secondary<br>bond axis <sup>d</sup><br>(°) |
|---------------------------|---------------------------------------|--------------------------------------|---------------------------------------|------------------------------------------|---------------------------------------|--------------------------------------------------|--------------------------------------------------|
| <b>100/relax</b>          | <b>Fe1:</b> 61.7,<br><b>Fe2:</b> 32.8 | <b>Fe1:</b> 6.9,<br><b>Fe2:</b> -2.8 | <b>Fe1:</b> 33.4,<br><b>Fe2:</b> 33.0 | <b>Fe1:</b> 4.9,<br><b>Fe2:</b> -0.8     | <b>Fe1:</b> 34.0,<br><b>Fe2:</b> 38.0 | <b>Fe1:</b> 44.0,<br><b>Fe2:</b> 44.2            | <b>Fe1:</b> 32.4,<br><b>Fe2:</b> 46.1            |
| <b>100/flash</b>          | <b>Fe1:</b> 45.8,<br><b>Fe2:</b> 50.5 | <b>Fe1:</b> 3.2,<br><b>Fe2:</b> 1.6  | <b>Fe1:</b> 32.5,<br><b>Fe2:</b> 34.5 | <b>Fe1:</b><br>6.76,<br><b>Fe2:</b> -2.9 | <b>Fe1:</b> 33.2,<br><b>Fe2:</b> 35.7 | <b>Fe1:</b> 42.6,<br><b>Fe2:</b> 51.8            | <b>Fe1:</b> 42.4,<br><b>Fe2:</b> 48.4            |
| <b>100/1</b>              | <b>Fe1:</b> 40.4,<br><b>Fe2:</b> 57.0 | <b>Fe1:</b> 1.9,<br><b>Fe2:</b> 1.3  | <b>Fe1:</b> 33.1,<br><b>Fe2:</b> 35.1 | <b>Fe1:</b> 6.3<br><b>Fe2:</b> -2.1      | <b>Fe1:</b> 33.4,<br><b>Fe2:</b> 34.8 | <b>Fe1:</b> 42.7,<br><b>Fe2:</b> 51.5            | <b>Fe1:</b> 43.3,<br><b>Fe2:</b> 47.4            |
| <b>150/1</b>              | <b>Fe1:</b> 35.7,<br><b>Fe2:</b> 59.6 | <b>Fe1:</b> 2.2,<br><b>Fe2:</b> 1.3  | <b>Fe1:</b> 32.3,<br><b>Fe2:</b> 35.2 | <b>Fe1:</b> 6.7,<br><b>Fe2:</b> -1.9     | <b>Fe1:</b> 33.1,<br><b>Fe2:</b> 35.2 | <b>Fe1:</b> 42.7,<br><b>Fe2:</b> 52.0            | <b>Fe1:</b> 43.1,<br><b>Fe2:</b> 48.4            |
| <b>200/1</b>              | <b>Fe1:</b> 31.5,<br><b>Fe2:</b> 60.0 | <b>Fe1:</b> 2.2,<br><b>Fe2:</b> 2.6  | <b>Fe1:</b> 31.6,<br><b>Fe2:</b> 35.4 | <b>Fe1:</b> 8.8,<br><b>Fe2:</b> -4.4     | <b>Fe1:</b> 33.3,<br><b>Fe2:</b> 34.1 | <b>Fe1:</b> 43.2,<br><b>Fe2:</b> 53.8            | <b>Fe1:</b> 43.5,<br><b>Fe2:</b> 52.7            |
| <b>250</b>                | <b>Fe1:</b> 31.1,<br><b>Fe2:</b> 60.0 | <b>Fe1:</b> 2.3,<br><b>Fe2:</b> 2.5  | <b>Fe1:</b> 31.7,<br><b>Fe2:</b> 35.6 | <b>Fe1:</b> 8.6,<br><b>Fe2:</b> -4.2     | <b>Fe1:</b> 33.4,<br><b>Fe2:</b> 34.0 | <b>Fe1:</b> 43.5,<br><b>Fe2:</b> 54.2            | <b>Fe1:</b> 43.5,<br><b>Fe2:</b> 52.4            |

<sup>a</sup> The linker torsion angle measured from planes of each benzene group linked to a reference plane, identifying the degree of twist the linker region adopts at each end of the helicate.

<sup>b</sup> Pitch specifies the back and forth rocking orientation of the chelate groups in relation to the intermetallic axis.

<sup>c</sup> Yaw specifies the side-to-side twisting orientation of the chelate rings relative to the intermetallic axis.

<sup>d</sup> The secondary bonding axis measures the orientation of the terminal pyridine groups with respect to the intermetallic axis.

\* In structures exhibiting orientational disorder, the parameter values were calculated for each part, and those values were scaled by the occupancy of the respective part and summed to provide the stated value.

### S8.1. Linker torsion

The linker ring torsion angle can be calculated for each benzene ring separately for each linker segment. First, a reference plane outlining the linker (C10-O1-C19) was calculated for each ligand (Figure S10a). Then the planes of each aromatic ring attached to O1 (C10-C15; C16-C21) were calculated. The angle between the reference plane and each aromatic plane were taken (Figure S10b), which is indicative of the degree to which the benzene rings are twisted with respect to the overall linker segment.



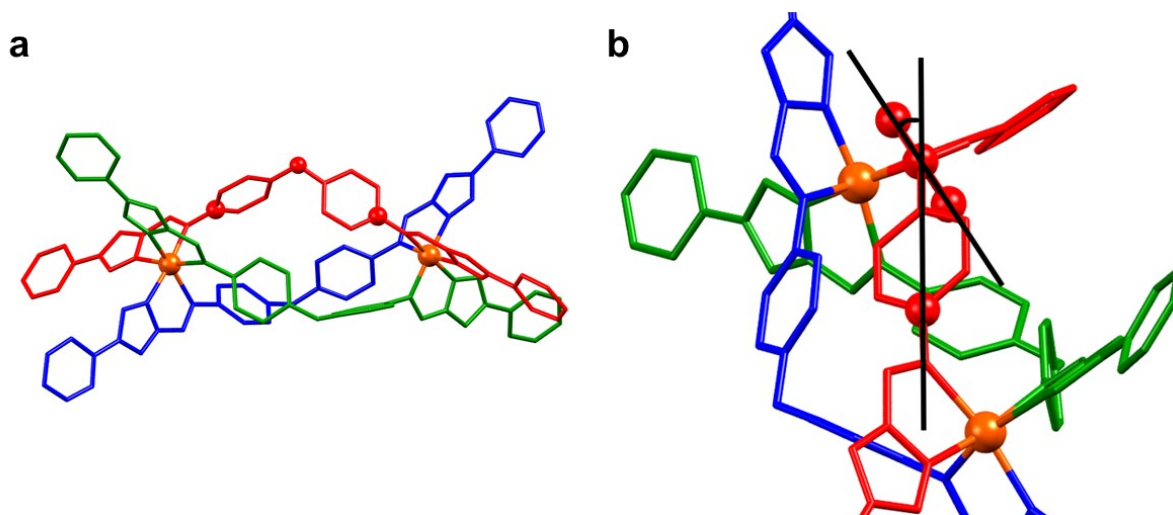

**Figure S10.** Schematic representing the linker torsion angle. a) The atoms selected (shown as balls) to define the reference plane (C9-O1-C19). b) The measured angle for the linker torsion with respect to the reference plane.

### S8.2. Pitch and yaw

The angle between the chelate ring and intermetallic axis can be deconstructed into two components, representing the back and forth rocking (pitch, Figure S11a,b) and side to side twisting (yaw, Figure S11c) of each chelate ring, relative to the intermetallic axis. In order to quantify these motions, we adapted the concepts of pitch, roll and yaw, such that the combination of each angular component uniquely described the orientation of each chelate ring relative to the intermetallic axis. The angle between the intermetallic axis is taken in two orthogonal two-dimensional projections, providing the pitch and yaw values of each of the six chelate rings in the helicate.

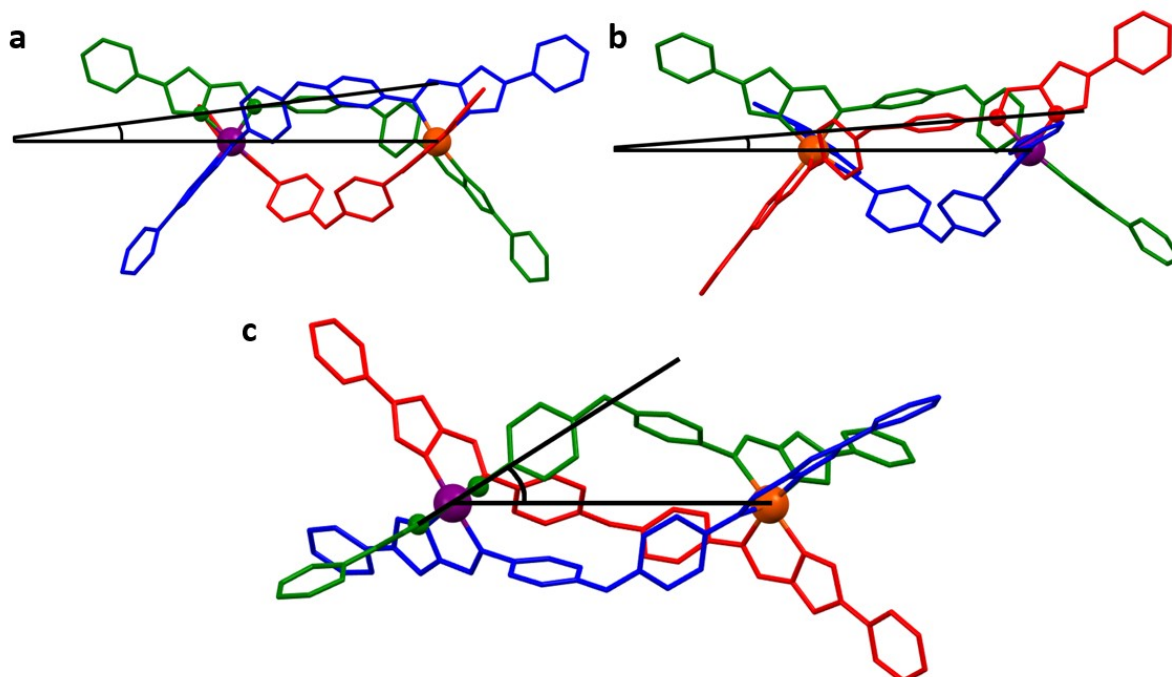

**Figure S11.** Schematics demonstrating a) the pitch angle for each chelate ring, in this case the pitch is positive, b) an example of negative pitch, c) the yaw angle for chelate rings.

After taking the coordinates of  $Fe_i$ ,  $Fe_j$ ,  $N_i$  and  $N_j$ , we subject them to the following procedure to calculate the pitch and yaw angular components.

- All coordinates were translated such that  $Fe_i$  occupied the origin.
- The cross product of vectors  $N_i$  and  $N_j$  was calculated.
- All coordinates rotated about the  $x$ -axis, such that the cross product lay in the  $xz$  plane.
- All coordinates were rotated about the  $y$ -axis, such that the cross product lay on the  $z$ -axis. This in turn means that  $N_i$  and  $N_j$  both lie in the  $xy$  plane.
- All coordinates were rotated about the  $z$ -axis, such that  $Fe_j$  lay in the  $xz$  plane.
- Yaw was calculated using the  $Fe_j$   $z$  and  $x$  coordinates by  $\arctan(z/x)$ .
- Pitch was calculated using the gradient of the  $N_i - N_j$  interval by  $\arctan((N_j y - N_i y) / (N_j x - N_i x))$ .

The signs of all yaw values were taken as positive, and the signs of pitch values were checked using the ratios of the  $y$  coordinates of  $N_j$  and  $N_i$  to determine the sign. Positive pitch was taken to mean the coordinating  $N$  in the imidazole lay closer to the intermetallic axis than the coordinating  $N$  of the imine, and the opposite is true in the case of negative pitch (Figure S11 a, b).

Since we are using a simplistic model, involving only the coordinating  $N$  atoms, we assume that the roll component is negligible i.e. the five-membered chelate ring is close to planar. Calculating the angle between the chelate interval and intermetallic axis in 2D projection orthogonal to those used for pitch and yaw arbitrarily returns the value of  $90^\circ$ .

### S8.3. Chelate ring angles and bond axis

In order to relate the motion of each ligand to distortions about each coordination centre, the angle between the vector defining each chelate ring ( $N_3-N_4$ ;  $N_6-N_5$ ) and the intermetallic axis ( $Fe_1-Fe_2$ ) was calculated.

The angle between each chelate ring and the intermetallic axis was calculated by a similar method to our previous work.<sup>4,5</sup> The coordinates of  $Fe_i$ ,  $Fe_j$  and two  $N$  atoms defining a chelate ring ( $N_i$  and  $N_j$ ) were taken. These coordinates were transformed by several operations as follows:

- All four points were translated by the same distance, such that  $Fe_i$  occupied the origin of the Cartesian system.
- Atoms  $N_i$  and  $N_j$  were translated by the same distance, such that  $N_i$  sat at the origin.
- All coordinates were rotated about the  $z$ -axis, such that the  $Fe_j$  sat in the  $xz$  plane.
- All coordinates were rotated about the  $x$ -axis, such that  $Fe_j$  sat on the  $z$ -axis.
- All coordinates were rotated about the  $z$ -axis, such that  $N_j$  sat in the  $yz$  plane. The angle between the chelate ring and the intermetallic axis was then calculated using the  $N_j$  coordinates by  $\arctan(y/z)$ .

The same methodology was used to quantify the spread of terminal pyridyl groups. In these calculations, the coordinates of the chelating N's were substituted with the pyridyl N and the opposite C in the same pyridine.

## S9. PXRD

### S9.1. PXRD Patterns

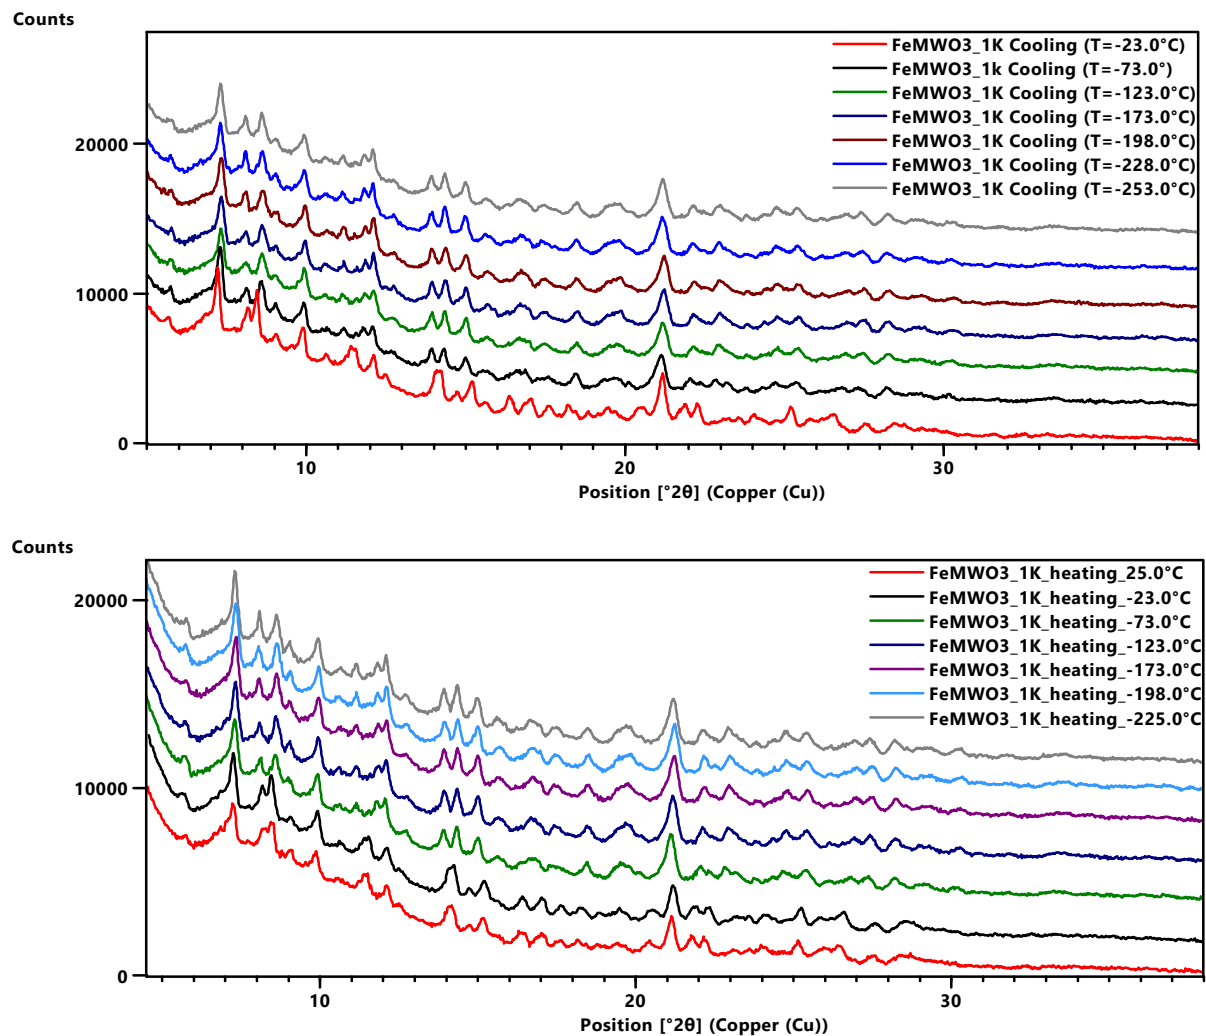

**Figure S12.** PXRD patterns of the  $1 \cdot 6\text{H}_2\text{O}$  at different temperatures and heating with  $1 \text{ K min}^{-1}$  cooling (top) and heating (bottom). The y-axis is scale adjusted to generate the stack plot. The peak at  $\sim 14^\circ 2\theta$  starts showing a split at after  $-73^\circ\text{C}$ .

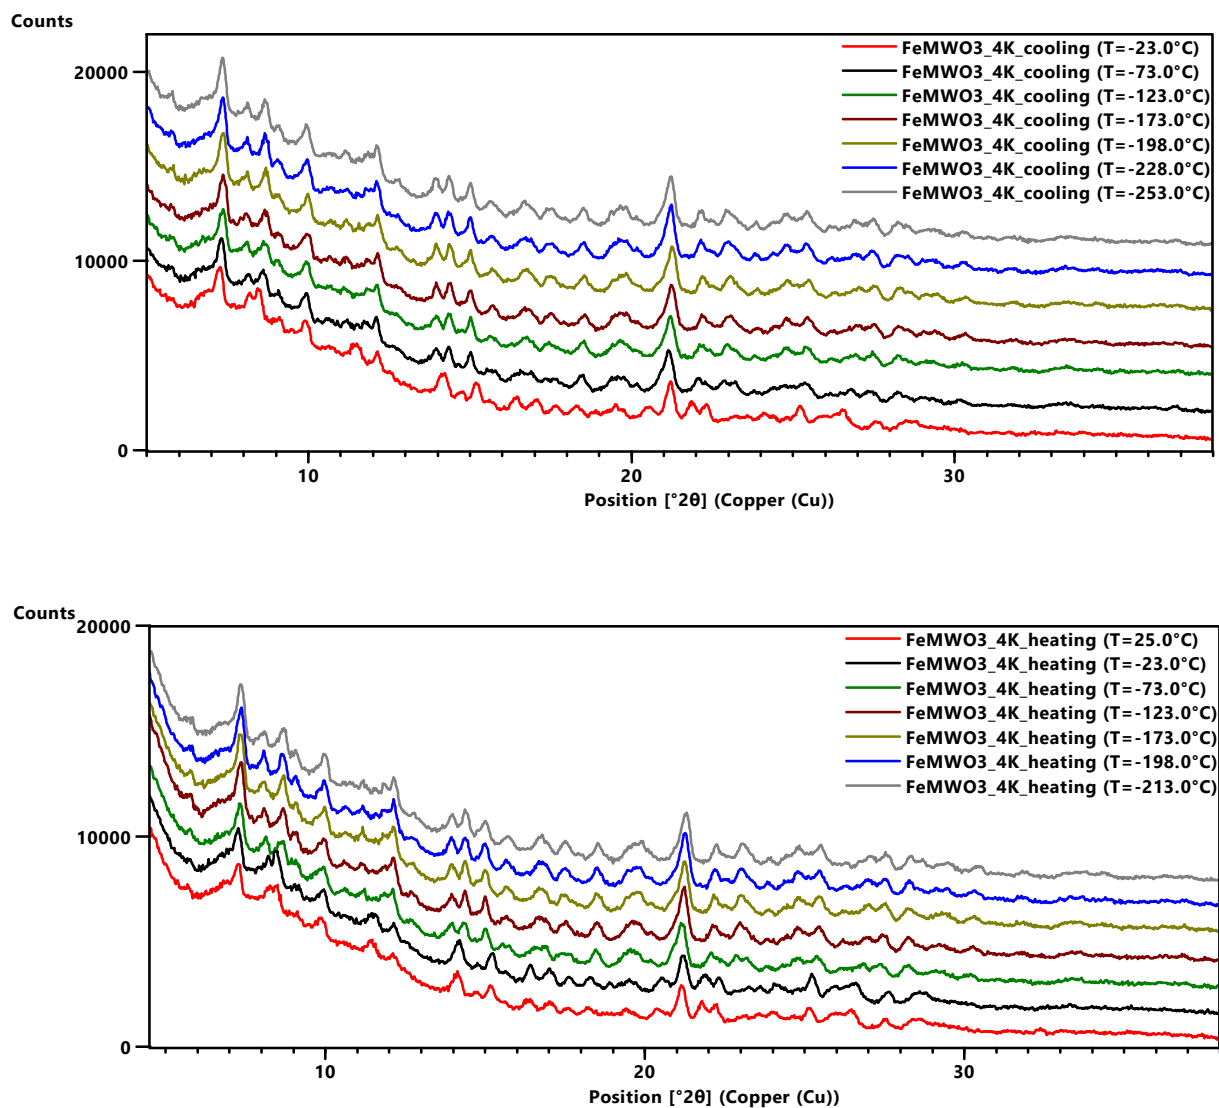

**Figure S13.** PXRd patterns of the  $1 \cdot 6\text{H}_2\text{O}$  at different temperatures and heating with  $4 \text{ K min}^{-1}$  cooling (top) and heating (bottom). The y-axis is scale adjusted to generate the stack plot. The peak at  $\sim 14^\circ 2-\theta$  starts showing a split at after  $-73^\circ\text{C}$ .

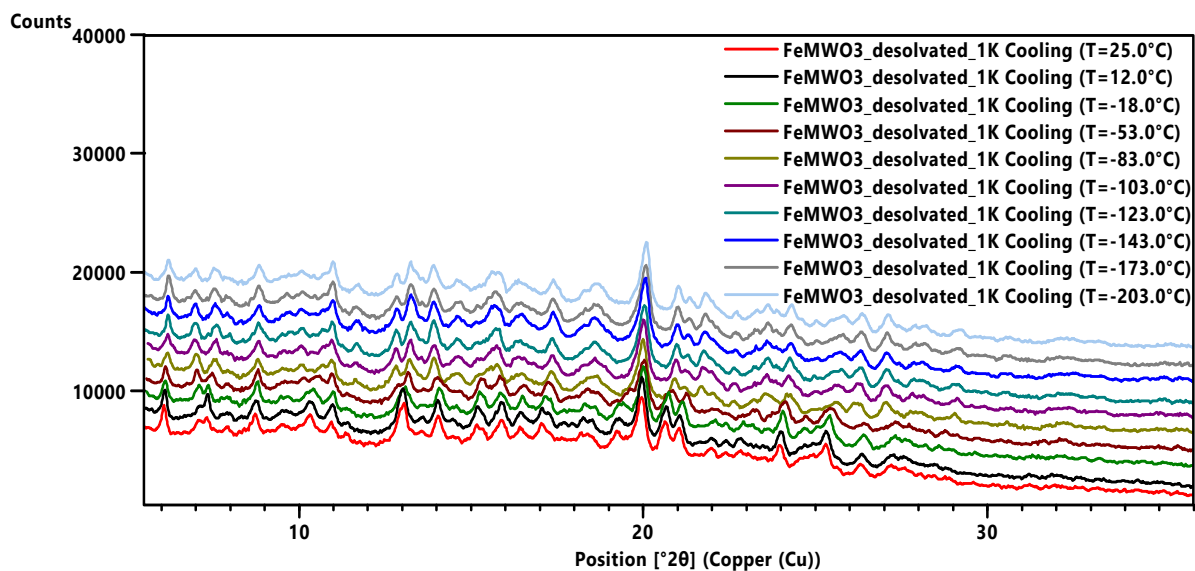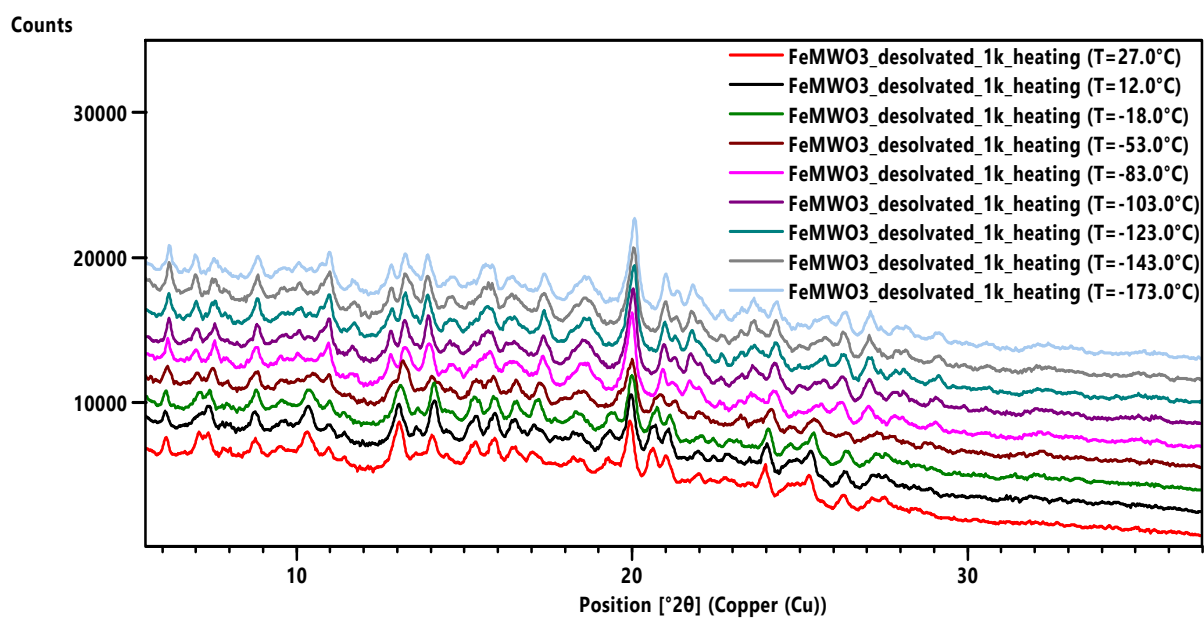

**Figure S14.** PXRD patterns of desolvated **1** at different temperatures with 1 K min<sup>-1</sup> cooling (top) and heating (bottom). The y-axis is scale adjusted to generate the stack plot.

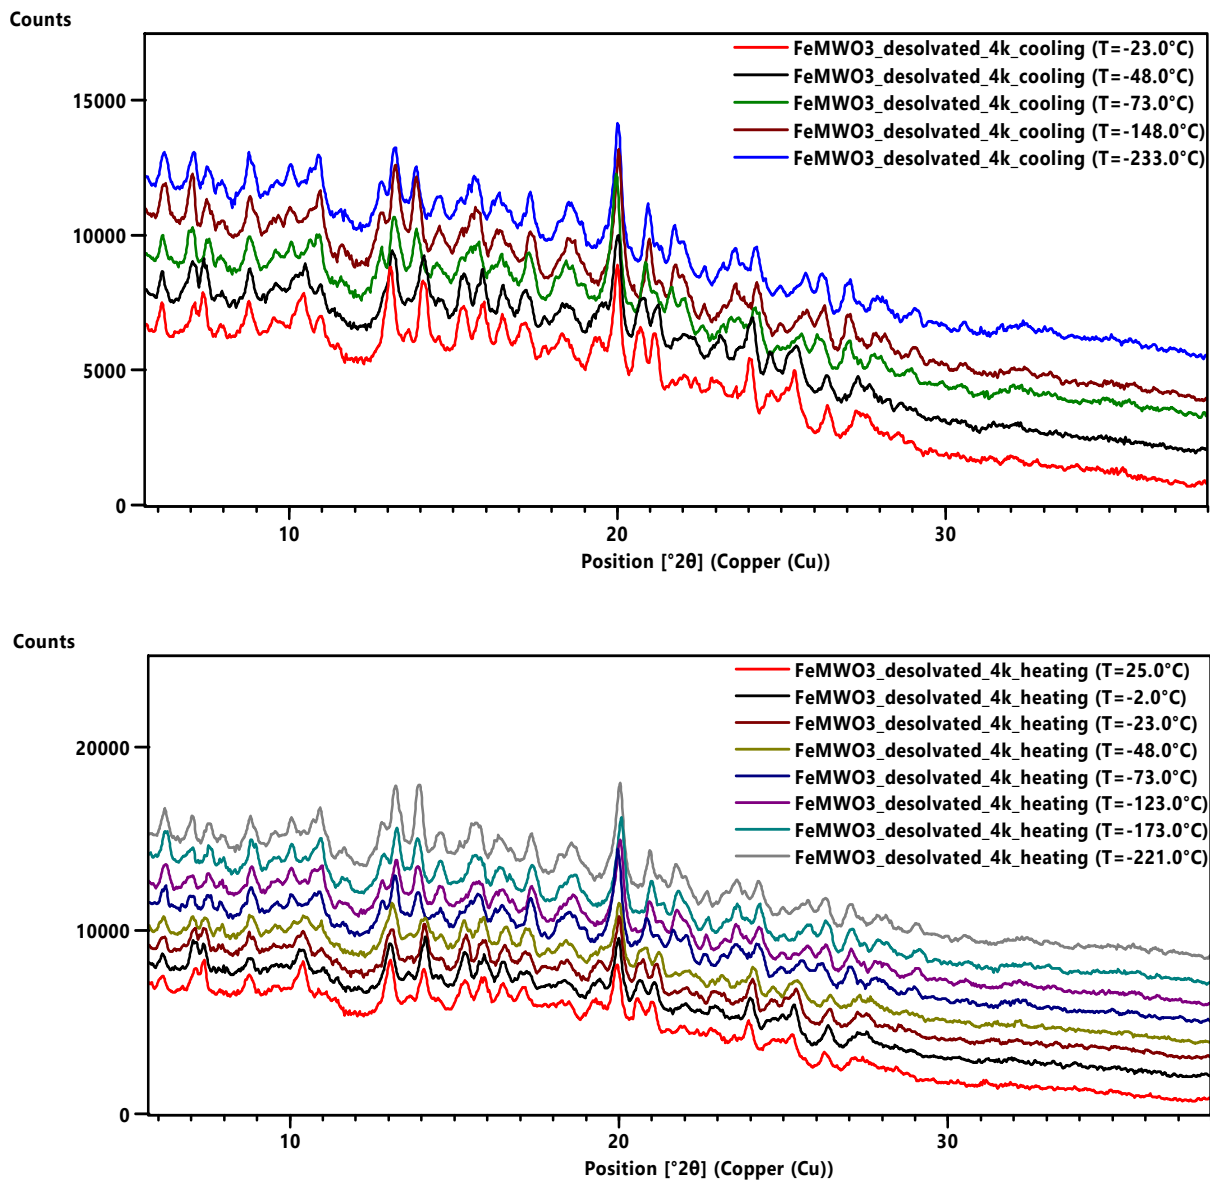

**Figure S15.** PXRD patterns of desolvated **1** at different temperatures with 4 K min<sup>-1</sup> cooling (top) and heating (bottom). The y-axis is scale adjusted to generate the stack plot.

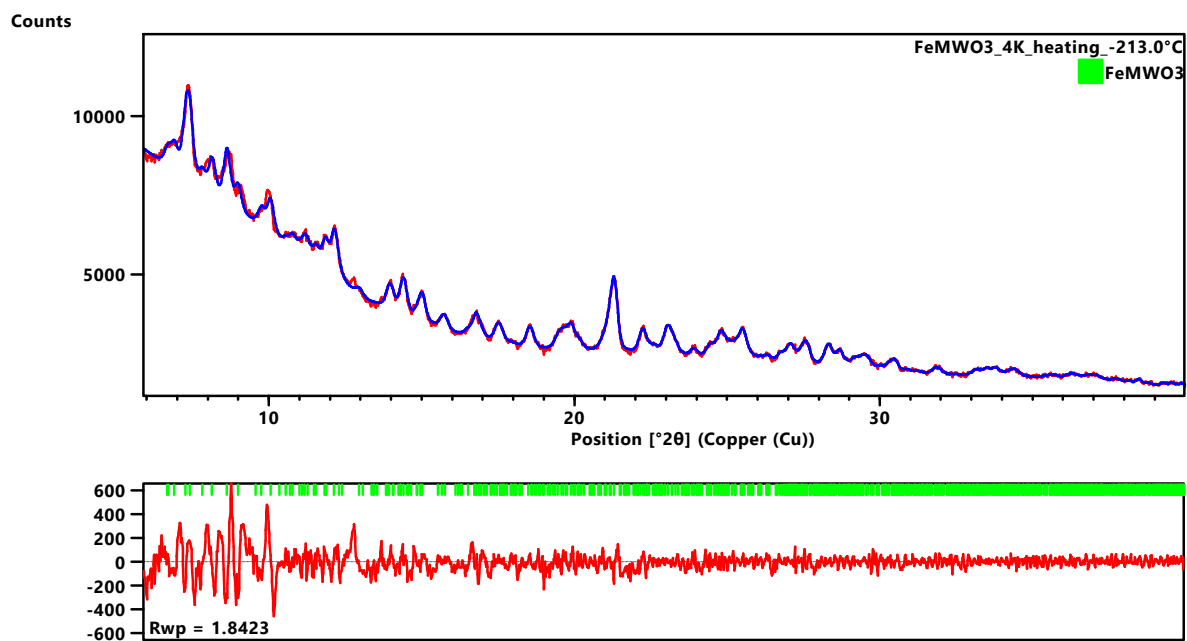

**Figure S16.** Full pattern Pawley fit plot at 60 K with 4 K min<sup>-1</sup> heating rate. Plot above is overlay of experimental (red) and calculated (blue) pattern. Plot below is difference plot.



## S9.2. PXRD scan-rate dependent spectral differences

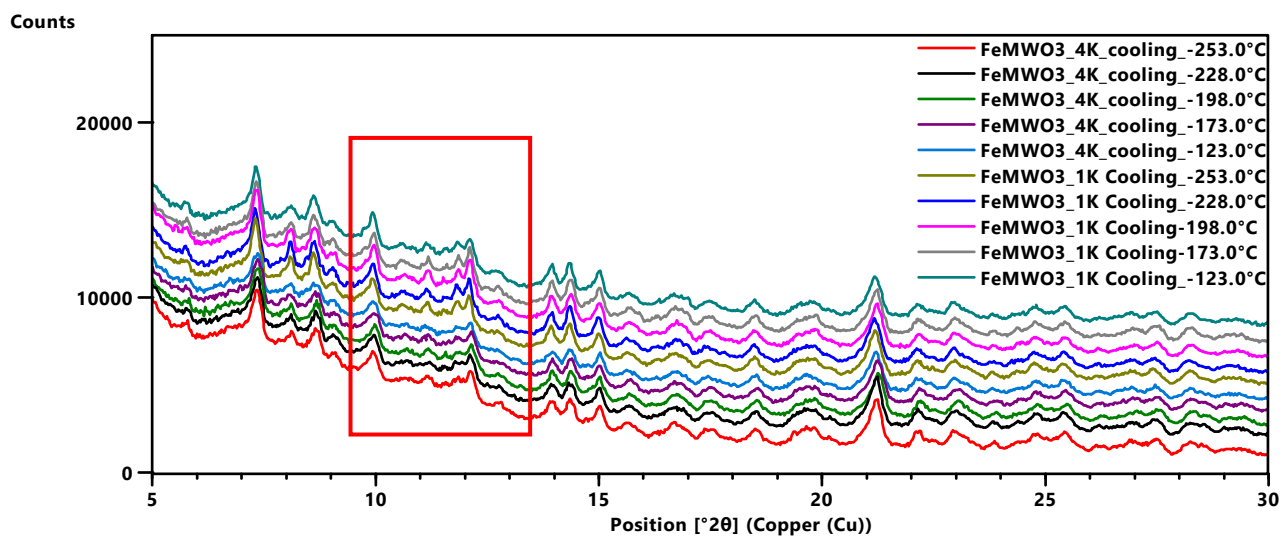

**Figure S17.** Comparison of powder patterns of  $1 \cdot 6\text{H}_2\text{O}$  at  $1 \text{ K min}^{-1}$  and  $4 \text{ K min}^{-1}$  cooling rates. The main region of difference is highlighted in the red box.

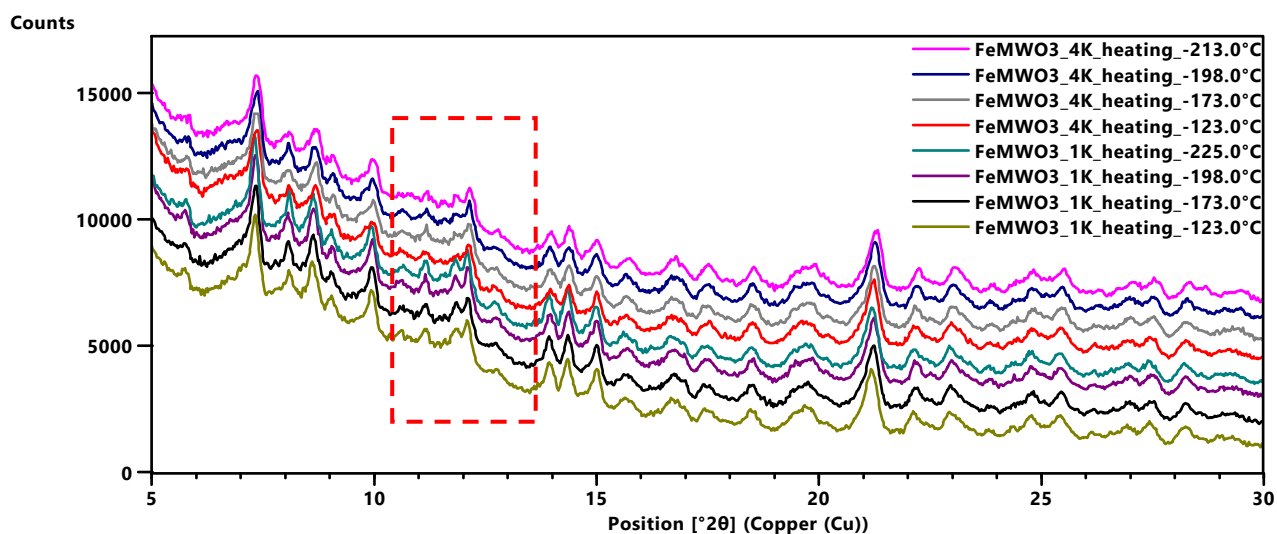

**Figure S18.** Comparison of powder patterns of  $1 \cdot 6\text{H}_2\text{O}$  at  $1 \text{ K min}^{-1}$  and  $4 \text{ K min}^{-1}$  heating rates. The main region of difference is highlighted in the red box.

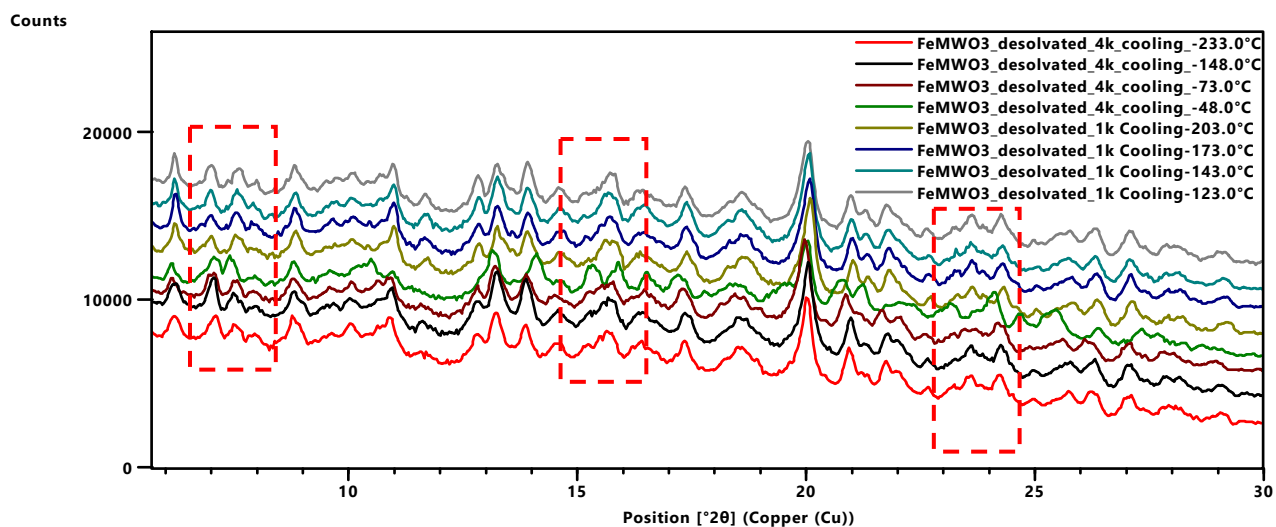

**Figure S19.** Comparison of powder patterns of desolvated **1** at 1 K min<sup>-1</sup> and 4 K min<sup>-1</sup> cooling rates. The main regions of difference is highlighted in the red boxes.

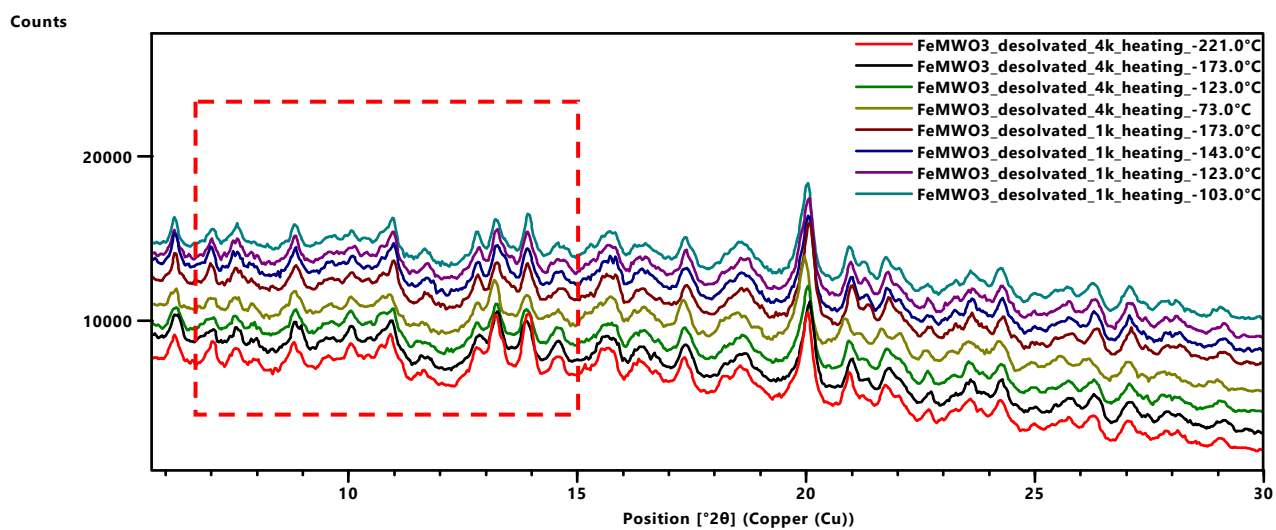

**Figure S20.** Comparison of powder patterns of desolvated **1** at 1 K min<sup>-1</sup> and 4 K min<sup>-1</sup> heating rates. The main region of difference is highlighted in the red box.

### S9.3. PXRD lattice parameters

**Table S8.** Lattice parameters of  $1 \cdot 6\text{H}_2\text{O}$  with  $1 \text{ K min}^{-1}$  scan rate. Scans are shown in the order they were performed in the variable temperature experimental run.

| Temperature (K) | a (Å)   | b (Å)   | c (Å)   | $\alpha$ (°) | $\beta$ (°) | $\gamma$ (°) | Volume (Å <sup>3</sup> ) |
|-----------------|---------|---------|---------|--------------|-------------|--------------|--------------------------|
| 250 (cooling)   | 16.3966 | 17.4306 | 21.2877 | 77.735       | 86.799      | 71.855       | 5649.2                   |
| 200 (cooling)   | 16.3753 | 17.3868 | 21.0361 | 77.379       | 88.791      | 72.703       | 5574.1                   |
| 150 (cooling)   | 16.0243 | 16.4073 | 20.5219 | 95.301       | 91.383      | 105.283      | 5185.7                   |
| 100 (cooling)   | 16.0147 | 16.3585 | 20.5073 | 95.196       | 91.174      | 104.785      | 5168.3                   |
| 75 (cooling)    | 16.0342 | 16.3236 | 20.4855 | 95.793       | 90.898      | 104.684      | 5161.2                   |
| 45 (cooling)    | 16.0659 | 16.3179 | 20.3354 | 96.242       | 90.606      | 104.423      | 5139.3                   |
| 20 (cooling)    | 16.0305 | 16.3128 | 20.1074 | 95.675       | 89.451      | 105.067      | 5058.9                   |
| 48 (heating)    | 16.0131 | 16.3270 | 20.2845 | 96.289       | 89.918      | 105.181      | 5103.5                   |
| 75 (heating)    | 16.0946 | 16.3275 | 20.5818 | 95.416       | 91.276      | 105.644      | 5195.1                   |
| 100 (heating)   | 16.3682 | 16.3533 | 20.6192 | 94.485       | 91.978      | 106.473      | 5262.6                   |
| 150 (heating)   | 16.2043 | 16.5440 | 20.7581 | 95.504       | 91.784      | 106.079      | 5312.9                   |
| 200 (heating)   | 16.1763 | 17.4998 | 20.8910 | 80.996       | 90.789      | 73.155       | 5587.0                   |
| 250 (heating)   | 16.2925 | 17.5300 | 20.9087 | 78.715       | 87.180      | 71.891       | 5584.3                   |
| 298 (heating)   | 16.4363 | 17.5005 | 21.2366 | 78.575       | 87.327      | 72.178       | 5699.3                   |

**Table S9.** Lattice parameters of  $1 \cdot 6\text{H}_2\text{O}$  with  $4 \text{ K min}^{-1}$  scan rate. Scans are shown in the order they were performed in the variable temperature experimental run.

| Temperature (K) | a (Å)   | b (Å)   | c (Å)   | $\alpha$ (°) | $\beta$ (°) | $\gamma$ (°) | Volume (Å <sup>3</sup> ) |
|-----------------|---------|---------|---------|--------------|-------------|--------------|--------------------------|
| 250 (cooling)   | 16.2688 | 17.5025 | 20.0688 | 78.582       | 87.348      | 72.173       | 5596.6                   |
| 200 (cooling)   | 16.2092 | 17.4918 | 21.5542 | 78.513       | 87.340      | 72.035       | 5591.2                   |
| 150 (cooling)   | 16.1402 | 16.3719 | 20.5400 | 95.594       | 90.178      | 106.153      | 5224.5                   |
| 100 (cooling)   | 16.1486 | 16.3571 | 20.5847 | 80.309       | 89.619      | 72.449       | 5212.8                   |
| 75 (cooling)    | 16.1504 | 16.3535 | 20.6237 | 79.897       | 89.514      | 72.318       | 5097.8                   |
| 45 (cooling)    | 16.1105 | 16.3238 | 20.5459 | 79.888       | 89.354      | 72.301       | 5087.4                   |
| 20 (cooling)    | 16.0976 | 16.3201 | 20.4999 | 79.760       | 88.486      | 71.994       | 5042.7                   |
| 60 (heating)    | 16.3617 | 16.5903 | 20.6240 | 95.534       | 91.382      | 106.233      | 5342.3                   |
| 75 (heating)    | 16.1553 | 16.3341 | 20.5816 | 95.130       | 91.258      | 105.741      | 5200.4                   |
| 100 (heating)   | 16.1735 | 16.3952 | 20.5912 | 95.551       | 91.141      | 105.904      | 5226.6                   |
| 150 (heating)   | 16.3435 | 16.6697 | 20.7569 | 95.890       | 90.797      | 106.318      | 5396.1                   |
| 200 (heating)   | 16.5637 | 17.5002 | 21.0366 | 78.707       | 87.617      | 71.431       | 5669.3                   |
| 250 (heating)   | 16.4099 | 17.5044 | 21.1416 | 78.873       | 87.251      | 72.169       | 5669.7                   |
| 298 (heating)   | 16.5034 | 17.5998 | 21.1921 | 78.092       | 86.985      | 72.819       | 5768.0                   |

**Table S10.** Lattice parameters of desolvated **1** with 1 K min<sup>-1</sup> scan rate. Scans are shown in the order they were performed in the variable temperature experimental run.

| Temperature (K) | a (Å)   | b (Å)   | c (Å)   | $\alpha$ (°) | $\beta$ (°) | $\gamma$ (°) | Volume (Å <sup>3</sup> ) |
|-----------------|---------|---------|---------|--------------|-------------|--------------|--------------------------|
| 298 (cooling)   | 16.2039 | 16.8025 | 20.4887 | 80.424       | 89.351      | 72.340       | 5236.9                   |
| 285 (cooling)   | 16.2155 | 16.7946 | 20.4675 | 80.350       | 89.413      | 72.503       | 5236.1                   |
| 255 (cooling)   | 16.2204 | 16.8078 | 20.4392 | 80.389       | 89.573      | 72.494       | 5234.2                   |
| 220 (cooling)   | 16.2232 | 16.7937 | 20.4166 | 80.211       | 89.654      | 72.609       | 5225.0                   |
| 190 (cooling)   | 16.1950 | 16.6959 | 20.4502 | 79.939       | 89.509      | 72.886       | 5198.0                   |
| 170 (cooling)   | 16.1199 | 16.5549 | 20.4335 | 80.017       | 89.407      | 72.749       | 5123.9                   |
| 150 (cooling)   | 16.1220 | 16.3927 | 20.3921 | 80.000       | 89.778      | 72.933       | 5067.3                   |
| 130 (cooling)   | 16.0944 | 16.3651 | 20.3402 | 80.181       | 89.760      | 72.892       | 5039.2                   |
| 100 (cooling)   | 16.0780 | 16.3497 | 20.3385 | 80.077       | 89.569      | 72.631       | 5020.6                   |
| 70 (cooling)    | 16.0565 | 16.2652 | 20.3351 | 80.209       | 89.593      | 72.594       | 4988.4                   |
| 100 (heating)   | 16.1141 | 16.4274 | 20.1953 | 80.171       | 89.586      | 72.776       | 5025.5                   |
| 130 (heating)   | 16.1407 | 16.4280 | 20.1937 | 80.118       | 89.744      | 72.780       | 5040.5                   |
| 150 (heating)   | 16.1814 | 16.5763 | 20.2194 | 79.922       | 89.502      | 72.738       | 5093.5                   |
| 170 (heating)   | 16.1875 | 16.6051 | 20.4405 | 80.060       | 89.454      | 72.680       | 5161.3                   |
| 190 (heating)   | 16.2175 | 16.7079 | 20.4727 | 80.125       | 89.541      | 72.541       | 5209.0                   |
| 220 (heating)   | 16.2173 | 16.7721 | 20.4176 | 79.978       | 89.398      | 72.555       | 5212.2                   |
| 255 (heating)   | 16.2300 | 16.7978 | 20.4398 | 80.308       | 89.469      | 72.398       | 5230.6                   |
| 285 (heating)   | 16.2279 | 16.7838 | 20.4812 | 80.361       | 89.593      | 72.446       | 5238.0                   |
| 300 (heating)   | 16.2426 | 16.8042 | 20.4603 | 80.408       | 89.618      | 72.484       | 5245.5                   |

**Table S11.** Lattice parameters of desolvated **1** with 4 K min<sup>-1</sup> scan rate. Scans are shown in the order they were performed in the variable temperature experimental run.

| Temperature (K) | a (Å)   | b (Å)   | c (Å)   | $\alpha$ (°) | $\beta$ (°) | $\gamma$ (°) | Volume (Å <sup>3</sup> ) |
|-----------------|---------|---------|---------|--------------|-------------|--------------|--------------------------|
| 250             | 16.2434 | 16.8569 | 20.4888 | 80.378       | 89.653      | 72.356       | 5265.1                   |
| 225             | 16.2182 | 16.8182 | 20.4502 | 80.203       | 89.800      | 72.474       | 5234.7                   |
| 200             | 16.1588 | 16.6778 | 20.3946 | 79.939       | 89.471      | 72.815       | 5164.8                   |
| 125             | 16.1096 | 16.5056 | 20.3028 | 80.018       | 89.704      | 72.706       | 5070.2                   |
| 50              | 16.0962 | 16.5005 | 20.3026 | 80.270       | 89.903      | 72.620       | 5065.2                   |
| 52              | 16.1099 | 16.5515 | 20.2337 | 80.173       | 89.637      | 72.450       | 5067.7                   |
| 100             | 16.1666 | 16.5891 | 20.2462 | 80.017       | 89.504      | 72.537       | 5101.4                   |
| 150             | 16.1685 | 16.6558 | 20.2460 | 80.052       | 89.636      | 72.605       | 5123.5                   |
| 200             | 16.1513 | 16.7570 | 20.4152 | 80.001       | 89.251      | 72.663       | 5189.0                   |
| 225             | 16.2121 | 16.8304 | 20.4068 | 80.380       | 89.873      | 72.618       | 5232.5                   |
| 250             | 16.2172 | 16.8338 | 20.4170 | 80.488       | 89.681      | 72.448       | 5233.6                   |
| 271             | 16.2357 | 16.8358 | 20.4316 | 80.526       | 89.639      | 72.291       | 5240.0                   |
| 298             | 16.2558 | 16.8464 | 20.4623 | 80.376       | 89.417      | 72.108       | 5252.0                   |

## S10. References

1. I.A. Guzei, *J. Appl. Crystallogr.* 2014, **47**, 806-809.
2. Z.G. Lada, *Magnetochemistry*. 2022, **8**, 108.
3. G.M. Sheldrick, *Acta. Cryst. C.* 2015, **71**, 3–8.
4. H. Min, A.R. Craze, T. Taira, M.J. Wallis, M.M. Bhadbhade, R. Tian, D.J. Fanna, R. Wuhrer, S. Hayami, J.K. Clegg, C.E. Marjo, L.F. Lindoy, F. Li, *Chemistry*. 2022, **4**, 535-547.
5. H. Min, A.R. Craze, M.J. Wallis, R. Tokunaga, T. Taira, Y. Hirai, M.M. Bhadbhade, D.J. Fanna, C.E. Marjo, S. Hayami, L.F. Lindoy, and F. Li, *Chem. Eur. J.* 2023, In press. <https://doi.org/10.1002/chem.202203742>.
6. M. Wallis, H. Min, L. F. Lindoy, and F. Li, *Molecules*, 2023, **28**, 1404.
